1 **Paradoxical neuronal hyperexcitability in a mouse model of mitochondrial pyruvate**  
2 **import deficiency**

3  
4 **Andres De la Rossa**<sup>1+</sup>, **Marine H. Laporte**<sup>1+</sup>, **Simone Astori**<sup>2+</sup>, Thomas Marissal<sup>3,4</sup>, Sylvie  
5 Montessuit<sup>1</sup>, Preethi Sheshadri<sup>5</sup>, Eva Ramos-Fernández<sup>2</sup>, Pablo Mendez<sup>6</sup>, Abbas Khani<sup>3</sup>,  
6 Charles Quairiaux<sup>3</sup>, Eric Taylor<sup>7</sup>, Jared Rutter<sup>8</sup>, José Manuel Nunes<sup>9</sup>, Alan Carleton<sup>3</sup>, Michael  
7 R. Duchen<sup>5</sup>, Carmen Sandi<sup>2\*</sup>, and Jean-Claude Martinou<sup>1\*</sup>.

8  
9 <sup>1</sup>Department of Cell Biology, University of Geneva. 1211 Geneva, Switzerland.

10 <sup>2</sup>Laboratory of Behavioral Genetics, Ecole Polytechnique Fédérale de Lausanne, Switzerland

11 <sup>3</sup>Department of Basic Neuroscience, University of Geneva. 1211 Geneva, Switzerland

12 <sup>4</sup>Institut de Neurobiologie de la Méditerranée, INSERM UMR1249, Université d'Aix-  
13 Marseille

14 <sup>5</sup>Department of Cell and Developmental Biology, University College London, London,  
15 WC1E 6BT

16 <sup>6</sup>Cajal Institute, Madrid, Spain.

17 <sup>7</sup>Department of Biochemistry and Fraternal Order of Eagles Diabetes Research Center, Carver  
18 College of Medicine, University of Iowa, Iowa City, IA USA

19 <sup>8</sup>Howard Hughes Medical Institute and Department of Biochemistry, University of Utah  
20 School of Medicine, Salt Lake City, UT, USA

21 <sup>9</sup>Department of Genetic and Evolution, University of Geneva, 1211 Geneva 4, Switzerland.

22  
23 +Equal contribution; \*Corresponding Author: [jean-claude.martinou@unige.ch](mailto:jean-claude.martinou@unige.ch),  
24 [carmen.sandi@epfl.ch](mailto:carmen.sandi@epfl.ch)

25  
26 **One Sentence Summary: Decreased OXPHOS and Ca<sup>2+</sup>-mediated neuronal**  
27 **hyperexcitability lead to seizure in a mouse model of mitochondrial pyruvate import**  
28 **deficiency.**

29  
30 **Key words**

31 Mitochondrial pyruvate carrier (MPC), neuronal excitability, KCNQ (Kv.7) channels, M  
32 current, Glycolysis, Ketogenic diet (KD),  $\beta$ -hydroxybutyrate ( $\beta$ HB), CamKII $\alpha$ -creERT2  
33 mice, Patch-clamp electrophysiology, epilepsy.

34

35 **Abstract**

36 Neuronal excitation imposes a high demand of ATP in neurons. Most of the ATP derives  
37 primarily from pyruvate-mediated oxidative phosphorylation, a process that relies on import  
38 of pyruvate into mitochondria occurring exclusively via the mitochondrial pyruvate carrier  
39 (MPC). To investigate whether deficient oxidative phosphorylation impacts neuron  
40 excitability, we generated a mouse strain carrying a conditional deletion of MPC1, an  
41 essential subunit of the mitochondrial pyruvate carrier, specifically in adult glutamatergic  
42 neurons. We found that, despite decreased levels of oxidative phosphorylation in these  
43 excitatory neurons, mice were normal at rest. Paradoxically, in response to mild inhibition of  
44 GABA mediated synaptic activity, they rapidly developed severe seizures and died, whereas  
45 under similar conditions the behaviour of control mice remained unchanged. We show that  
46 neurons with a deficient MPC are intrinsically hyperexcitable as a consequence of impaired  
47 calcium homeostasis, which reduces M-type potassium channel activity. Provision of ketone  
48 bodies restores energy status, calcium homeostasis and M-channel activity and attenuates  
49 seizures in animals fed a ketogenic diet. Our results provide an explanation for the  
50 paradoxical seizures that frequently accompany a large number of neuropathologies,  
51 including cerebral ischemia and diverse mitochondriopathies, in which neurons experience an  
52 energy deficit.

53

54

## 55 **Introduction**

56 The brain is by far the main consumer of glucose and oxygen in the body, with pre- and post-  
57 synaptic mechanisms being the primary sites of ATP consumption(1-3). Most of the ATP in  
58 neurons is produced in mitochondria through pyruvate-mediated oxidative phosphorylation  
59 (OXPHOS), even though aerobic glycolysis, or the so-called Warburg effect, can generate  
60 sufficient ATP to sustain several neuronal functions, including neuronal firing(3-7). In  
61 neurons, pyruvate is produced either by glycolysis or through the action of lactate  
62 dehydrogenase, which mainly uses lactate derived from astrocytes(8). Whatever the source,  
63 pyruvate transport into mitochondria provides fuel for the tricarboxylic acid (TCA) cycle and  
64 boosts ATP production by OXPHOS.

65 Entry of pyruvate into mitochondria is totally dependent on the mitochondrial pyruvate carrier  
66 (MPC), a heterodimer composed of two subunits, MPC1 and MPC2 inserted into the inner  
67 mitochondrial membrane(9, 10). Deletion of MPC1 or MPC2 is sufficient to inactivate the  
68 carrier activity, and in the mouse causes embryonic lethality at E12(11, 12). Interestingly,  
69 providing ketone bodies, which directly feed the TCA cycle with acetyl-CoA and boost  
70 OXPHOS, to the pregnant females allowed the embryos to survive until birth(12). Besides  
71 energy production, glucose oxidation via the TCA cycle is also required for the synthesis of  
72 essential molecules, including the neurotransmitters glutamate and  $\gamma$ -aminobutyric acid  
73 (GABA). Therefore ATP production and neurotransmitter release are tightly linked to glucose  
74 and pyruvate metabolism. Accordingly, genetic pathologies linked to impaired glucose or  
75 pyruvate oxidation, such as mutations in the glucose transporter 1 (GLUT1)(13), pyruvate  
76 dehydrogenase (PDH)(13), MPC(14, 15), or complexes of the respiratory chain(16), result in  
77 severe synaptic dysfunction(17). Not surprisingly, these diseases are frequently associated  
78 with brain hypoactivity, although paradoxically they are often accompanied by neuronal  
79 hyperexcitability and behavioural seizures of varying severity. This raises the question of how

80 these paroxysmal, ATP consuming events can occur in patients despite a global brain energy  
81 deficit.

82 A likely explanation for the hyperexcitable phenotype is that seizures are due to an imbalance  
83 between inhibitory (mainly GABAergic) and excitatory (mainly glutamatergic) neuronal  
84 activity. While it is understandable that GABAergic neurons may release less inhibitory  
85 GABA in the pathologies mentioned above, it remains unclear how excitatory neurons with  
86 limited ATP production capacity can display hyperactivity leading to paroxysmic seizures  
87 within the context of low GABAergic neuronal activity.

88 To test whether a change in neuronal metabolism would impact neuronal activity, we  
89 inactivated the MPC in adult mice, specifically in CamKII $\alpha$ -expressing neurons (i.e.  
90 excitatory neurons) to reduce their OXPHOS capacity, and we analysed their electrical  
91 activity at rest and upon pharmacological inhibition of GABAergic transmission. This was  
92 achieved through genetic ablation of the MPC1 gene in adult mice using a tamoxifen-  
93 inducible system. Furthermore, by using CamKII $\alpha$ -Cre mice we were able to target the MPC1  
94 deletion and study the impact of decreased pyruvate oxidation specifically in glutamatergic  
95 neurons. We found that, under resting conditions, mice lacking MPC1 in these excitatory  
96 neurons were indistinguishable from control mice in their general exploratory, social and  
97 stress-coping behaviors. In response to inhibition of GABA mediated synaptic activity they  
98 developed far more severe seizures than controls. We found that this phenotype was due to an  
99 intrinsic membrane hyperexcitability of MPC1-deficient glutamatergic neurons, which  
100 resulted from a calcium-mediated decrease in M-type K<sup>+</sup> channel activity. Strikingly, the  
101 hyperexcitability phenotype was reversed when the animals were maintained on a ketogenic  
102 diet.

103

104 **Results**

105 **MPC-deficient cortical neurons display decreased pyruvate-mediated oxidative**  
106 **phosphorylation in vitro.**

107 To assess the role of the mitochondrial pyruvate carrier (MPC) in neuronal OXPHOS, we first  
108 used primary cultures of cortical neurons largely depleted of astrocytes (Supplementary figure  
109 1a) and either RNA interference or pharmacological reagents to downregulate their MPC  
110 activity. To this end, two different shRNAs targeting MPC1 and three different  
111 pharmacological inhibitors of the carrier were used. Expression of either of the two shRNAs  
112 produced a significant reduction in MPC1 and MPC2 protein levels (the latter being unstable  
113 in the absence of MPC1) (Supplementary figure 1b, c). Both genetic and pharmacological  
114 impairment of MPC activity resulted in decreased pyruvate-driven basal and maximal oxygen  
115 consumption rates (OCR) (Figure 1a, Supplementary figure 1d) and decreased mitochondrial  
116 ATP production (Figure 1b), which is consistent with previously published results(18).  
117 Furthermore, mitochondrial membrane potential, measured using mitotracker and TMRE was  
118 significantly reduced in MPC-deficient neurons (Figure 1c, f). This was associated with an  
119 increased extracellular acidification rate (Supplementary figure 1e) and increased glucose  
120 uptake, which was measured using the 2-NBDG import assay (Supplementary figure 1f), two  
121 hallmarks of aerobic glycolysis.

122 We have previously reported that ketone bodies can restore normal OXPHOS in MPC-  
123 deficient murine embryonic fibroblasts(12). Consistent with this, we found that addition of the  
124 ketone body  $\beta$ -hydroxybutyrate ( $\beta$ HB) to the culture medium rescued all observed defective  
125 functionalities in MPC-deficient neurons, including oxygen consumption, ATP production,  
126 membrane potential (Figure 1d-f) and both extracellular acidification rate and glucose uptake  
127 (Supplementary figure 1g, h). Thus, we concluded that MPC-deficient neurons display low  
128 pyruvate-mediated oxidative phosphorylation and high aerobic glycolysis, both overcome

129 with  $\beta$ HB.

130

### 131 **Generation of mice with inducible MPC1 gene deletion in adult glutamatergic neurons**

132 Based on the results described above, and because neural excitation requires massive levels of  
133 ATP, we hypothesized that loss of MPC activity would reduce excitability especially in  
134 glutamatergic neurons that are high energy consumers(19). To test this hypothesis, we  
135 generated a mouse strain with an inducible deletion of the MPC1 gene, specifically in the  
136  $\text{Ca}^{2+}$ -calmodulin kinase II $\alpha$  (CamKII $\alpha$ )-expressing neurons, found predominantly in the  
137 hippocampus and cortex(20). We crossed MPC1<sup>flox+/flox+</sup> mice with the commercially  
138 available CamKII $\alpha$ -CreERT2 mice (Figure 2a). Induction of Cre activity by injection of  
139 Tamoxifen for 5 consecutive days resulted in deletion of MPC1 FLOXed alleles in the  
140 CamKII $\alpha$ -expressing adult neurons (Figure 2a). Hereafter, we refer to these mice as neuro-  
141 MPC1-KO. *In situ* immunofluorescence analyses showed a decrease in neuronal MPC1  
142 immunostaining in various layers of the cortex of neuro-MPC1-KO mice (Figure 2b).  
143 Western blot analysis of whole cortex, synaptosomes and mitochondria showed a significant  
144 decrease of both MPC1 and MPC2 in neuro-MPC1-KO mice compared to neuro-MPC1-WT  
145 mice (Figure 2c). Consistent with the results obtained with cultured neurons, we found that  
146 synaptosomes prepared from the cortex of neuro-MPC1-KO mice displayed lower oxygen  
147 consumption and imported higher amounts of glucose compared to synaptosomes from neuro-  
148 MPC1-WT mice (Supplementary figure 2a, b). Importantly, the lack of MPC1 did not affect  
149 the neuronal cell survival quantified either by counting the total number of cells, or by the  
150 number of apoptotic (TUNEL positive) cells (Supplementary figure 2c, d). At adulthood,  
151 both genotypes displayed similar body weight and lean mass composition (Supplementary  
152 figure 2e, f). At the behavioral level, adult neuro-MPC1-KO mice showed a tendency toward

153 lower anxiety-like behaviors, but no difference in general locomotion, sociability or stress-  
154 coping behaviors (Supplementary figure 2g-j).

155 These data indicate that, under resting conditions, the excitatory neurons in most adult mice  
156 have the ability to bypass the MPC to meet their metabolic demands.

157

158 **Neuro-MPC1-KO mice are highly sensitive to pro-convulsant drugs and develop acute**  
159 **epileptic-like seizures**

160 The output activity of a neuron results from the balance between the excitatory and the  
161 inhibitory inputs it receives. Perturbation of this delicate balance can lead to severe seizures  
162 as a result of exacerbated, uncontrolled neuronal firing. To test whether OXPHOS-deficient  
163 excitatory neurons could sustain intense neuronal firing, we challenged neuro-MPC1-KO  
164 adult mice, with either pentylentetrazole (PTZ), a GABA receptor antagonist, or kainic acid,  
165 an activator of glutamate receptors. We used the PTZ kindling protocol described  
166 previously(21), in which a sub-convulsant dose (35mg/kg) of PTZ is injected intraperitoneally  
167 (ip) once every two days on a period of 15 days (Figure 3a). Phenotypic scoring after each  
168 PTZ injection in neuro-MPC1-WT mice showed a progressive sensitization (kindling) starting  
169 with hypoactivity after the first injection (scored as 1); a few brief and transient muscle  
170 contractions (jerks, scored as 2) or appearance of tail rigidity (Straub's tail, scored as 3)  
171 following the second or third injection; and convulsive status epilepticus (scored as 6) after  
172 the 6<sup>th</sup> or 7<sup>th</sup> injection (Figure 3a, b). In contrast, all neuro-MPC1-KO mice developed severe,  
173 prolonged seizures (score 6) within 10 min of the first PTZ injection (Figure 3b) and all died  
174 during seizures within the next three PTZ injections (Supplementary figure 3a). When mice  
175 were injected with 20 mg/kg kainic acid, a similar hypersensitivity (score 6) was observed in  
176 neuro-MPC1-KO mice indicating that this sensitivity is not restricted to PTZ (Supplementary  
177 figure 3b).

178 In a parallel series of experiments, and in order to assess the specificity of our results to  
179 excitatory neurons, we investigated the effects of PTZ in mice in which MPC1 was deleted in  
180 adult astrocytes (hereafter termed astro-MPC1-KO mice) (Supplementary figure 3c-e). In  
181 contrast to neuro-MPC1-KO mice, astro-MPC1-KO mice showed the same response as  
182 control animals following PTZ injection (Supplementary figure 3f, g), indicating that the  
183 phenotype observed in neuro-MPC1-KO mice is linked to the deletion of MPC1 in excitatory  
184 neurons.

185 To characterize the seizure symptoms in more detail, we recorded the electrical activity in the  
186 brains of neuro-MPC1-WT and neuro-MPC1-KO mice by electroencephalogram (EEG)  
187 following a single injection of PTZ (Figure 3c). In neuro-MPC1-KO mice, rhythmic EEG  
188 patterns emerged within 5-10 minutes after PTZ injection, invading all electrodes (Figure 3c).  
189 These electrical patterns coincided with the occurrence of behavioural manifestations of  
190 seizures, i.e. tonic-clonic movements. Rapidly thereafter, large spike and wave discharges  
191 developed, again invading all surface electrodes and coinciding with numerous fast ripples  
192 (Figure 3c, inset). Such EEG patterns are characteristic of seizure episodes in humans and  
193 were not observed in the PTZ-injected neuro-MPC1-WT mice. These data indicate that neuro-  
194 MPC1-KO mice develop an epilepsy-like phenotype following administration of a single sub-  
195 convulsant dose of PTZ.

196 We also tested whether we could reproduce the seizure phenotype using hippocampal  
197 organotypic cultures from  $\text{CamKII}\alpha\text{-CreERT2}^+\text{-MPC1}^{\text{Flox+}/\text{Flox+}}$  mice exposed to PTZ,  
198 combined with calcium imaging. Individual neurons in hippocampal slices from both WT and  
199 KO mice exhibited spontaneous calcium activity throughout the duration of the recordings  
200 (Figure 3d, e and videos 1 and 2) although, interestingly, the frequency of calcium events, as  
201 well as the number of co-activation events (i.e. neuronal synchronizations above chance  
202 levels) generated in MPC1-deficient neurons were significantly higher than those generated in



203 MPC1-WT neurons (Figure 3f, g and videos 1 and 2). In contrast, neither the amplitude nor  
204 the duration of the discharges was modified (Figure 3h, i). These results suggest that neuro-  
205 MPC1-KO neurons are more active and are more often recruited into synchronized patterns  
206 associated with the epileptic activity.

207

### 208 **Inhibition of PTZ-induced seizures in neuro-MPC1-KO mice by the ketogenic diet**

209 The ketogenic diet (KD) has been reported to decrease seizures in patients with  
210 pharmacologically refractory epilepsy(22). Ketone bodies, mainly generated by the liver  
211 during fasting and hypoglycaemia, are used by neurons to provide the TCA cycle with acetyl-  
212 CoA, normally provided by pyruvate dehydrogenase-mediated oxidation of pyruvate. Thus,  
213 ketone bodies ensure that oxidative phosphorylation and ATP production is maintained in  
214 neurons in conditions of glucose starvation. We tested whether a ketogenic diet could prevent  
215 PTZ-induced seizures in neuro-MPC1-KO mice. As previously reported(23), we found that  
216 the KD produces a decrease in glycaemia and an increase in the blood level of 3- $\beta$ -hydroxy-  
217 butyrate ( $\beta$ HB), one of the three major ketone bodies generated by the liver (Supplementary  
218 figure 4a, b). In addition, we found that mice fed on the KD for one week were completely  
219 resistant to PTZ injection (Figure 4a). Supplementing the drinking water with 1%  $\beta$ HB was  
220 sufficient to prevent PTZ-induced seizures (Figure 4b). Similarly, ip administration of  $\beta$ HB  
221 15 minutes before PTZ injection, or starvation overnight, both of which conditions led to  
222 increased  $\beta$ HB blood levels (Supplementary figure 4c-e), significantly reduced the PTZ-  
223 induced clinical score of neuro-MPC1-KO mice (Figure 4b, c). These results indicate that the  
224 phenotype displayed by the neuro-MPC1-KO mice is mainly metabolic in origin and is  
225 unlikely to be the consequence of neuronal network remodelling.

226

227 **MPC1-deficient neurons display intrinsic hyperexcitability, which is prevented by**  
228 **ketone bodies**

229 To investigate the cellular mechanisms that might mediate the sensitivity of neuro-MPC1-KO  
230 mice to pro-convulsant drugs, we examined the electrophysiological properties of MPC1-  
231 deficient neurons. To this end, we performed whole-cell patch clamp recordings in acute  
232 hippocampal slices from neuro-MPC1-KO mice and their neuro-MPC1-WT littermates. CA1  
233 pyramidal cells from neuro-MPC1-KO mice exhibited higher discharge frequency compared  
234 to neurons from neuro-MPC1-WT mice when firing was elicited by somatic injections of  
235 current ramps of increasing amplitude (Figure 5a, b). Neurons from neuro-MPC1-KO mice  
236 required less current injection (rheobase, Figure 5c) to reach the firing threshold, which was  
237 more hyperpolarized when compared to neuro-MPC1-WT cells (Figure 5d). Similarly,  
238 MPC1-KO neurons displayed higher firing when depolarization was induced with squared  
239 current pulses (Supplementary figure 5a, b).

240 Next, we asked whether ketone bodies, which as shown in Figure 4 prevent PTZ-induced  
241 seizures, could modulate neuronal excitability and restore normal cell discharges in neuro-  
242 MPC1-KO mice. For these experiments, we first recorded action potential firing under control  
243 conditions, and then perfused the slices with  $\beta$ HB (2 mM, >20 min exposure). As shown in  
244 Figure 5, whereas cell firing was unaltered in neuro-MPC1-WT cells (Figure 5e, f),  $\beta$ HB  
245 reduced excitability in pyramidal cells from the neuro-MPC1-KO mice (Figure 5g, h). Control  
246 experiments showed that cell excitability from both genotypes was unchanged during  
247 prolonged recordings (Figure 5f, h), confirming that the change in neuro-MPC1-KO firing  
248 was not due to a rundown in cellular excitability caused by, e.g., cell dialysis.

249 Taken together, these results indicate that ketone bodies reduce the intrinsic hyperexcitability  
250 of glutamatergic cells from neuro-MPC1-KO mice, providing a plausible explanation for the  
251 protective effect of the KD against PTZ-induced seizures.

252

253 **MPC1-deficient neurons display altered M-type potassium channel activation, which is**  
254 **corrected by  $\beta$ -hydroxybutyrate**

255 To gain insight into the mechanisms governing neuronal hyperexcitability, we analysed the  
256 cellular passive properties and action potential characteristics of all recordings performed in  
257 cells from neuro-MPC1-KO and neuro-MPC1-WT mice (Supplementary figure 5c-k). The  
258 reduction in rheobase and the shift in threshold potential induced by MPC1 deletion were  
259 accompanied by several changes in passive and active membrane properties governing cell  
260 excitability, including a significant increase in the input resistance ( $R_i$ ) and in the voltage  
261 response to a depolarizing current injection ( $\text{depol}_{\text{sub}}$ ), along with a marginally significant  
262 reduction in HCN channel-mediated sag (Supplementary figure 5c-i). The fast  
263 afterhyperpolarization (fAHP) accompanying action potentials was not altered, ruling out a  
264 major contribution of BK channels (Supplementary figure 5j). However, the medium  
265 afterhyperpolarization (mAHP), measured as the negative peak of the voltage deflection at the  
266 offset of the depolarizing ramps was significantly reduced in cells from neuro-MPC1-KO  
267 mice (Supplementary figure 5k). In CA1 pyramidal cells, mAHP is primarily mediated by the  
268 activation KCNQ2/3 (Kv7.2 and Kv7.3) channels, which generate an M-type  $K^+$  conductance  
269 regulating intrinsic excitability and synaptic integration(24, 25). Opening of these channels  
270 produces an outward potassium current that functions as a ‘brake’ for neurons receiving  
271 persistent excitatory input(26). Consistently, mutations in KCNQ2/3 genes have been  
272 associated with seizures in the mouse(27), as well as in patients(28, 29), pointing to these  
273 channels as interesting targets for anticonvulsant therapy(30). To verify whether neuro-  
274 MPC1-KO mice display an altered contribution of the M-type  $K^+$  conductance, we tested the  
275 effect of the M-type channel blocker XE991 (10  $\mu\text{M}$ ) on CA1 pyramidal cell firing. XE991  
276 led to a significant increase in firing frequency of neuro-MPC1-WT cells, whereas firing of

277 neuro-MPC1-KO cells was not significantly modified (Figure 5i, j). Consistently, XE991  
278 induced a significant reduction in the rheobase and a shift in the threshold potential in neuro-  
279 MPC1-WT cells, but had no impact on neuro-MPC1-KO cells (Figure 5k, l), pointing to a  
280 limited activity of KCNQ2/3 channels in these neurons. Interestingly, bath application of  $\beta$ HB  
281 following KCNQ2/3 channel blockade with XE991 failed to reduce the hyperexcitability of  
282 neuro-MPC1-KO mice (Figure 5j-l). We also noticed that, in the absence of XE991, the  
283 reduction of intrinsic excitability by  $\beta$ HB in MPC-deficient neurons was accompanied by a  
284 significant increase in mAHP (Figure 5m, n), suggesting that  $\beta$ HB may potentiate the  
285 recruitment of the M-type  $K^+$  channels. Moreover, the M-type channel activator retigabine (10  
286  $\mu$ M) effectively decreased the hyperexcitability of pyramidal cells from neuro-MPC1-KO  
287 mice to a level that was no further affected by  $\beta$ HB (Figure 5o, p). This suggests that  $\beta$ HB  
288 and retigabine display a similar mechanism of action, which is consistent with recent findings  
289 showing that  $\beta$ HB can directly bind to and activate KCNQ2/3 channels(31).

290 We finally tested whether the increased neuronal excitability in neuro-MPC1-KO mice was  
291 also accompanied by alterations in glutamatergic transmission. In acute slices, we recorded  
292 field potentials in CA1 stratum radiatum elicited by electrical stimulation of the Schaffer  
293 collaterals (Supplementary figure 5l). No overt genotype differences were found in the input-  
294 output curves of field excitatory postsynaptic potentials (fEPSPs), and the lack of changes in  
295 paired-pulse ratio indicated no major alteration in the presynaptic release (Supplementary  
296 figure 5m, n).

297 Altogether, these results indicate that the hyperexcitability of CA1 pyramidal neurons from  
298 neuro-MPC1-KO mice is mediated by alterations in intrinsic cell excitability associated with a  
299 reduced M-type  $K^+$  channel activation, with no major changes in excitatory synaptic inputs.

300

301

### 302 **Alteration of calcium homeostasis in MPC1-deficient neurons**

303 The conductance of KCNQ channels is regulated by phosphatidylinositol-4,5-bisphosphate  
304 (PIP<sub>2</sub>) and calmodulin (CaM)(32, 33). In particular, reduction in free CaM in hippocampal  
305 neurons decreases M-current density and increases neuronal excitability(34, 35). Thus,  
306 calcium can trigger loss of interaction of CaM and KCNQ2/3 channels, leading to M-type  
307 current suppression(36).

308 We tested whether disruption of calcium homeostasis could be responsible for the deficit in  
309 the M-type K<sup>+</sup> channel activity displayed by MPC1-deficient neurons. We first assess whether  
310 calcium homeostasis was perturbed in MPC-deficient cortical neurons in vitro. Using the  
311 fluorimetric calcium probes Fura2-AM and the low affinity FuraFF-AM and live cell  
312 imaging, we found a significant increase in the peak concentration of cytosolic calcium upon  
313 depolarization of both control and MPC-deficient neurons in response to either glutamate (10  
314 μM) or KCl (50 mM) (Figure 6a-c; Supplementary figure 6a-d). However, while the peak of  
315 calcium concentration was transient in control neurons, and returned to basal levels, both the  
316 magnitude and duration of the calcium elevation were greater in MPC-deficient neurons  
317 (Figure 6a, Supplementary figure 6d, Wash). Interestingly, the long lasting increased calcium  
318 level in MPC-deficient neurons was abolished by addition of 10 mM βHB to the culture  
319 medium 30 min prior to recording (Figure 6a-c). Together these results show that loss of MPC  
320 activity leads to a significant increase of cytosolic calcium levels in depolarized neurons.

321 Mitochondria import calcium through the mitochondrial calcium uniporter (MCU) in a  
322 membrane potential dependent manner and thereby play a major role in calcium  
323 homeostasis(37). In an interesting study published during the preparation of this manuscript, it  
324 was reported that inhibition of the MPC in cardiomyocytes and hepatocytes can result in  
325 higher expression of the MCU gatekeeper MICU1 and inhibition of MCU-mediated calcium  
326 uptake(38). However, our investigations did not validate this hypothesis (Supplementary

327 figure 7). Therefore, we focused our study on the mitochondrial membrane potential, which  
328 we found reduced in the MPC-deficient neurons (Figure 1c, f), and which could affect the  
329 buffering capacity of mitochondria upon stimulation. This hypothesis was tested using Fura2-  
330 loaded cultured cortical neurons at rest or upon stimulation with KCl, in the presence or  
331 absence of chemical inhibitors of the MPC. These experiments confirmed that the peak and  
332 duration of calcium concentration in the cytosol were significantly increased in MPC-  
333 deficient neurons (Figure 6d-f). The mitochondrial uncoupler FCCP was then added to the  
334 cultures to release the calcium retained in the mitochondria. The amount of calcium released  
335 from MPC-deficient mitochondria by FCCP was significantly lower than in wild type controls  
336 (Figure 6d-f), suggesting that the capacity of mitochondria to import and store calcium was  
337 decreased in these neurons. Moreover, the elevation of cytosolic calcium seen in MPC-  
338 deficient neurons was recapitulated in WT neurons following the addition of RU360, an  
339 inhibitor of the MCU (Figure 6d-f). To further test whether the increased cytosolic calcium  
340 resulting from dysfunctional mitochondria was responsible for the hyperexcitability of MPC1-  
341 deficient neurons, we performed electrophysiological recordings in CA1 pyramidal cells in  
342 presence of RU360 into the patch pipette. In neuro-MPC1-WT cells, addition of 1  $\mu$ M or 10  
343  $\mu$ M RU360 to the cell pipette caused an increase in cell firing (Figure 6g, h) while 10  $\mu$ M  
344 RU360 had no effect in neuro-MPC1-KO cells (Figure 6i, j). Importantly, blockade of the  
345 MCU with RU360 in neuro-MPC1-WT cells was accompanied by a significant reduction in  
346 the mAHP (Figure 6k, l), indicating that calcium alterations induced by mitochondrial  
347 dysfunction may indeed affect M-type  $K^+$  channel activation. Finally, whereas  $\beta$ HB treatment  
348 did not significantly alter the firing of neuro-MPC1-WT cells in control conditions (Figure 5e,  
349 f), it reduced the excitability of cells infused with 10  $\mu$ M RU360 while slightly increasing  
350 mAHP (Figure 6 m, n), consistent with the hypothesis that  $\beta$ HB normalizes the alteration in  
351 the M-type  $K^+$  conductance.

352 Altogether, our results show that MPC1-deficient neurons display a lower mitochondrial  
353 calcium buffering capacity which may explain the hypoactivity of the M-type  $K^+$  channel and  
354 the intrinsic hyperexcitability of neurons.

355

356 **Discussion**

357 Tight coupling of neuronal activity to energy metabolism is essential for normal brain  
358 function. Here, to assess the contribution of metabolism in neuronal activity, we inactivated  
359 the MPC specifically in adult CamKII $\alpha$ -expressing neurons in the mouse. As previously  
360 reported(18)(39), we found that loss of the MPC led to decreased OXPHOS in glutamatergic  
361 neurons. Despite this, these mice appeared normal at rest and presented a normal behavioral  
362 repertoire (i.e., novelty exploration, sociability, stress coping), except for lower anxiety-like  
363 behaviors which are consistent with a higher glutamatergic tone(40). However, they  
364 developed severe seizures immediately following low level administration of two pro-  
365 convulsant drugs, the GABA receptor antagonist pentylenetetrazole (PTZ), or the glutamate  
366 receptor agonist kainic acid.

367 The lack of an apparent phenotype in neuro-MPC1-KO mice under resting conditions  
368 suggests that, up to a certain point, mitochondria can compensate for the deficit in  
369 mitochondrial pyruvate import by using other substrates to fuel the TCA cycle. Recently,  
370 Timper et al.(41) reported that proopiomelanocortin (POMC)-expressing neurons, in which  
371 OXPHOS was impaired either by partial inactivation of Apoptosis-Induced Factor or by  
372 deletion of MPC1, were able to rewire their metabolism towards mitochondrial fatty acid  
373 oxidation to stimulate mitochondrial respiration. However, it seems unlikely that such a  
374 compensatory mechanism can occur in MPC1-deficient glutamatergic neurons since these  
375 neurons do not express the enzymes necessary for  $\beta$ -oxidation of fatty acids(42). Furthermore,  
376 it is unlikely that the astrocyte-neuron-shuttle, which supplies astrocyte-derived lactate to  
377 neurons to boost OXPHOS(43), can circumvent the loss of the MPC since all available data  
378 thus far indicate that lactate must first be converted by neuronal LDH into pyruvate in order to  
379 fuel the TCA cycle.



380 Instead, our data point toward aerobic glycolysis as a likely compensatory mechanism for the  
381 OXPHOS deficit as several studies have reported that increased glycolysis at the synapse,  
382 uncoupled from oxidative phosphorylation, could provide sufficient ATP to ensure normal  
383 neurotransmission(6, 44). It is therefore possible that, under resting conditions, increased  
384 aerobic glycolysis participates in the activity of MPC1-deficient glutamatergic neurons.

385 Despite the lack of an obvious phenotype in resting mice, we found that, when challenged  
386 with the pro-convulsant molecules PTZ or kainic acid, the neuro-MPC1-KO mice were far  
387 more sensitive than WT animals and rapidly exhibited severe acute seizures. This suggests  
388 that the basal electrical activity of MPC1-deficient neurons may be continuously  
389 counterbalanced by inhibitory synapses, providing the normal resting phenotype described  
390 above. However, upon release of the ‘brakes’ exerted by the inhibitory system, the neuro-  
391 MPC1-KO neurons would become hyperactive, which would translate into the observed  
392 epileptic output. Consistent with our data, mice deficient in pyruvate dehydrogenase (PDH),  
393 the enzyme acting immediately downstream of the MPC, were found to display an  
394 epileptiform cortical activity accompanied by behaviorally observable seizures(45). In this  
395 case, the epileptiform activity occurred in the context of reduced background cortical  
396 activation and, as suggested by the authors, the most likely explanation was that seizures  
397 resulted from a combination of decreased activity of inhibitory neurons, mostly parvalbumin-  
398 expressing cortical neurons, with slightly overexcitable excitatory neurons. Similar to PDH-  
399 deficient neurons, we found that the MPC1-deficient neurons displayed higher input  
400 resistance and increased spike frequency after stimulation, a phenotype that we investigated  
401 further and found to be mediated by an impairment of the medium component of the after-  
402 hyperpolarization potential mediated by an M-type K<sup>+</sup> conductance.

403 K<sup>+</sup> efflux is the primary force behind the cellular repolarization that limits the spike after  
404 depolarization and thereby prevents neuronal hyperexcitability. One important class of K<sup>+</sup>

405 channels that fulfills this task is the M-current (*I<sub>M</sub>*)-generating KCNQ channel family (also  
406 called Kv7 channels)(46). In hippocampal neurons the *I<sub>M</sub>* is mediated by the KCNQ2 and  
407 KCNQ3 channels (Kv7.1 and Kv7.2), which form hetero or homodimers. Loss of function of  
408 KCNQ2 or KCNQ3 causes epilepsy in humans and mice(27, 47-49). In support of the notion  
409 that these channels underlie the intrinsic membrane hyperexcitability of MPC1-KO neurons,  
410 we found that inhibition of these channels using the small molecule XE991 did not change the  
411 electrical properties of KO neurons, while it made WT neurons more excitable. Our results  
412 suggest that KCNQ2/3 channels are closed in MPC1-deficient neurons, and that this could  
413 underlie their hyperexcitability. The reason for the silencing of these channels appears to be  
414 linked to an excess of cytosolic calcium. The calcium binding protein, Calmodulin (CaM), has  
415 been shown to bind to the C-terminal part of the KCNQ channel and to be required for its  
416 activity(34). Intracellular calcium decreases CaM-mediated KCNQ channel activity(32, 36)  
417 by detaching CaM from the channel or by inducing changes in configuration of the  
418 calmodulin-KCNQ channel complex(36). Importantly, increasing cytosolic calcium levels in  
419 wild type neurons from acute hippocampal slices, using the MCU inhibitor RU360, was  
420 sufficient to increase their firing properties, while RU360 had no significant effect on the  
421 excitability of the neuro-MPC1-KO neurons. The increased intracellular levels of calcium in  
422 neuro-MPC1-KO neurons probably result from a decreased capacity of mitochondria to buffer  
423 cytosolic calcium. Such a reduction in calcium buffering is likely to be the consequence of a  
424 reduced mitochondrial membrane potential, directly linked to a decreased oxygen  
425 consumption and OXPHOS. It is known that cells with low respiratory capacity consume  
426 ATP through the ATP synthase to maintain a minimal mitochondrial membrane potential that  
427 allows them to survive(50). Accordingly, ketone bodies, which restore oxygen consumption,  
428 ATP production, and mitochondrial membrane potential, reduce the excitability of neuro-  
429 MPC1-KO neurons. In addition our study suggest that  $\beta$ HB could act directly on the M-

430 channel, as previously reported by Manville et al.,(31) .

431 In conclusion, using mice carrying an inducible deletion of the MPC specifically in excitatory  
432 neurons, we have shown that, despite impaired pyruvate-mediated OXPHOS, glutamatergic  
433 neurons can sustain high firing and trigger severe behaviourally observable seizures when the  
434 GABAergic network is inhibited. Furthermore, our data provide an explanation for the  
435 paradoxical hyperactivity of excitatory neurons resulting from OXPHOS deficits, which often  
436 accompanies neuropathologies such as cerebral ischemia or diverse mitochondriopathies, and  
437 identify KCNQ channels as interesting therapeutic targets to prevent seizures occurring in  
438 these pathologies.

439

## 440 **Material and Methods**

### 441 **Study design**

442 Data sources from mice included in vivo (behavioural tests, pro-convulsant drug injections,  
443 electroencephalogram), brain slice recordings of neuronal activity and electrophysiology,  
444 isolation of synaptosomes and primary culture of cortical neurons. For mouse experiments,  
445 pilot data from three or four samples per group provided an estimate of SD and effect  
446 magnitude, which, together with a power of 0.8 and  $P < 0.05$ , guided sample sizes using the  
447 G\*power software (G\*power version 3.1.9.6.). MPC1-WT and MPC1-KO mice from the  
448 same litter were randomly selected for experiments. Replicates and statistical tests are cited  
449 with each result. All procedures were approved by the Institutional Animal Care and Use  
450 Committee of the University of Geneva and with permission of the Geneva cantonal  
451 authorities. Data analysis was blind and performed concurrently on control and experimental  
452 data with the same parameters. No data, including outlier values, were excluded.

453

### 454 **Mice**

455 The CamKII $\alpha$ -CreERT2 mouse was obtained from Jackson (stock number 012362). The  
456 MPC1<sup>Flox/Flox</sup> mouse was a gift from professor Eric Taylor (University of Iowa)(Gray). The  
457 Ai14 reporter mouse was a gift from professor Ivan Rodriguez (University of  
458 Geneva)(Madisen). The GFAP-CreERT2 mouse was a gift from professor Nicolas Toni  
459 (University of Lausanne)(51). By using the Cre driver lines, we generated two different cell-  
460 type specific MPC1-KO mice: CamKII $\alpha$ -CreERT2<sup>+</sup>-MPC1<sup>Flox+/Flox+</sup> mice (here called neuro-  
461 MPC1-KO) in which MPC1 was knocked out specifically in excitatory glutamatergic  
462 neurons; and GFAP-CreERT2<sup>+</sup>-MPC1<sup>Flox+/Flox+</sup> mice in which MPC1 is knockout specifically  
463 is astrocytes (here called astro-MPC1-KO). In all experiments age-matched wild type controls  
464 were used and are referred to in the text as neuro-MPC1-WT (CamKII $\alpha$ -CreERT2<sup>-</sup>-  
465 MPC1<sup>Flox+/Flox+</sup>) and astro-MPC1-WT mice (GFAP-CreERT2<sup>-</sup>-MPC1<sup>Flox+/Flox+</sup>). The neuro-  
466 MPC1-KO and astro-MPC1-KO phenotypes were tamoxifen-inducible. In order to induce  
467 MPC1 deletion, the mice were injected intraperitoneally (ip) for 5 consecutive days with  
468 100 $\mu$ l of 10mg/ml tamoxifen (Sigma, 85256) in sunflower oil. The mice were considered to  
469 be MPC1-KO from one week after the final injection. All experiments were carried out in  
470 accordance with the Institutional Animal Care and Use Committee of the University of  
471 Geneva and with permission of the Geneva cantonal authorities (Authorization numbers  
472 GE/42/17, GE/70/15, GE/123/16, GE/86/16, GE/77/18, GE/205/17) and of the Veterinary  
473 Office Committee for Animal Experimentation of Canton Vaud (Authorization number  
474 VD3081).

475

#### 476 **Pentylenetetrazol (PTZ)-induced convulsion protocol**

477 We used the PTZ kindling model of epilepsy as described in Dhir et al.,(21). Briefly, this test  
478 entails chronic intraperitoneal (ip) injection of 35 mg/kg PTZ (Sigma, P6500), which is a sub-  
479 convulsant dose for WT mice, every 2 days for 2 weeks, and after each PTZ injection, the

480 mice were scored according to their clinical symptoms, as described in previously (21)(52).  
481 After each PTZ injection, the animals were gently placed in isolated transparent plexiglass  
482 cages and their behaviour was observed to assign a seizure score based on the following  
483 criteria: stage 1: sudden behavioral arrest and/or motionless staring; stage 2: jerks; stage 3:  
484 Straub's tail (rigid tail being held perpendicularly to the surface of the body); stage 4: partial  
485 clonus in a sitting position; stage 5: generalized clonus; stage 6: convulsions including clonic  
486 and/or tonic-clonic seizures while lying on the side and/or wild jumping (convulsive status  
487 epilepticus). Mice were scored over a period of 30 min and the tests were performed in semi-  
488 blind mode (carried out by 2 experimenters of which only one knew the genotype). After the  
489 PTZ test, mice were immediately sacrificed in a CO<sub>2</sub> chamber. The seizure severity score was  
490 calculated by taking the sum of the behavior and seizure patterns for all animals in a group  
491 and dividing by the number of animals present in the group.

492

### 493 **Electroencephalogram (EEG)**

494 Surface EEGs were recorded in head-fixed, awake animals with 32 stainless steel electrodes  
495 (500 µm Ø) covering the entire skull surface as described previously(53, 54). Briefly, a head-  
496 post was placed under isoflurane anaesthesia allowing head-fixation. Recording sessions took  
497 place after a period of 4 days of head-fixation training to allow acclimatization of the animals  
498 to the experimental setup. PTZ was injected ip at the beginning of the session.  
499 Electrophysiological differential recordings were acquired with a Digital Lynx SX  
500 (Neuralynx, USA) at a sampling rate of 4 kHz and with a 2kHz low-pass. The ground  
501 electrode was placed above the nasal bone and the reference electrode was placed on the  
502 midline between parietal bones (channel 31, Figure 3C). All signals were calculated against  
503 the average reference offline.

504

505 **Patch-clamp electrophysiology**

506 Tamoxifen-treated MPC1Flox/Flox-CamKII $\alpha$ Cre(+) mice and wild-type littermates (6-10  
507 weeks-old) were anaesthetized with isoflurane and decapitated, and the brain was quickly  
508 removed and placed in oxygenated (95% O<sub>2</sub> / 5% CO<sub>2</sub>) ice-cold N-Methyl-D-glucamine  
509 (NMDG)-based medium, containing (in mM): 110 NMDG, 2.5 KCl, 1.2 NaH<sub>2</sub>PO<sub>4</sub>, 30  
510 NaHCO<sub>3</sub>, 20 HEPES, 10 MgCl<sub>2</sub>, 0.5 CaCl<sub>2</sub>, 25 glucose, 5 L(+)-ascorbic acid, 2 thiourea, 3  
511 Na-pyruvate (titrated to pH 7.2-7.3 with HCl). Acute hippocampal transverse slices (350  $\mu$ m  
512 thick) were cut using a vibrating tissue slicer (Campden Instruments). Slices recovered for 1 h  
513 at 35°C and subsequently at room temperature in a storage solution containing (in mM): 92  
514 NaCl, 2.5 KCl, 1.2 NaH<sub>2</sub>PO<sub>4</sub>, 30 NaHCO<sub>3</sub>, 20 HEPES, 2 MgCl<sub>2</sub>, 2 CaCl<sub>2</sub>, 25 glucose, 5 L(+)-  
515 ascorbic acid, 2 thiourea, 3 Na-pyruvate (titrated to pH 7.2-7.3 with NaOH). In the recording  
516 chamber, slices were superfused with oxygenated standard artificial cerebrospinal fluid  
517 (aCSF) containing (in mM): 130 NaCl, 25 NaHCO<sub>3</sub>, 2.5 KCl, 1.25 NaH<sub>2</sub>PO<sub>4</sub>, 1.2 MgCl<sub>2</sub>, 2  
518 CaCl<sub>2</sub>, 18 glucose, 1.7 L(+)-ascorbic acid.

519 Whole-cell patch clamp recordings were performed at nearly physiological temperature (30-  
520 32°C), with borosilicate pipettes (3-4 M $\Omega$ ) filled with (in mM): 130 KGluconate, 10 KCl, 10  
521 HEPES, 10 phosphocreatine, 0.2 EGTA, 4 Mg-ATP, 0.2 Na-GTP (290-300 mOsm, pH 7.2-  
522 7.3). A control experimental series was conducted with narrow pipettes tips (9-10 M $\Omega$ ) filled  
523 with (in mM): 130 KGluconate, 5 KCl, 10 HEPES, 5 Sucrose (275-280 mOsm, pH 7.2-7.3),  
524 in order to delay intracellular dialysis(45) and minimize interference with intracellular ATP  
525 and Ca<sup>2+</sup> levels. In this series, neuronal firing was measured within the first 1.5 min after  
526 whole-cell establishment (supplementary figure 8).

527 To elicit neuronal firing, cells were held at -60 mV with direct current injections, and somatic  
528 current injections of increasing amplitude were provided using ramps of 5 s (6 ramps with  
529 final amplitude ranging from 50 pA to 300 pA) or squared pulses of 2 s (25 pA delta increase,

530 max amplitude 200 pA). Input resistance ( $R_i$ ) was assessed by the passive current response to  
531 a -10 mV hyperpolarizing step while cells were held at -60 mV. In control condition, resting  
532 membrane potential ( $V_{rmp}$ ) and neuronal firing were measured within the first 5 min from the  
533 establishment of the whole-cell condition. The rheobase and the firing threshold were  
534 measured as the level of current and voltage, respectively, that induced the first action  
535 potential in the ramp protocol. The effect of  $\beta$ -hydroxybutyrate (2 mM) was assessed after  
536 >20 min perfusion, and compared to cell firing prior to perfusion.

537 Signals were acquired through a Digidata1550A digitizer, amplified through a Multiclamp  
538 700B amplifier, sampled at 20 kHz and filtered at 10 kHz using Clampex10 (Molecular  
539 Devices).

540

#### 541 **Cell culture and lentiviral transduction**

542 Wild type pregnant mice were decapitated and E18 embryos were collected in HBSS medium.  
543 Primary cultures of cortical neurons were prepared as described previously(55). For MPC1  
544 downregulation, at 7 days in vitro (DIV), neurons were treated with lentiviral particles  
545 containing shRNA targeting MPC1 for a further 7-8 days. Briefly, to prepare viral particles,  
546 Hek293T cells were transfected with packaging and envelope expressing plasmids together  
547 with PLKO.1-shRNA control (SHC016, SIGMA) or targeting MPC1 (ShMPC1\_1:  
548 CCGGGCTGCCTTACAAGTATTAAATCTCGAGATTTAATACTTGTAAGGCAGCTTTTT ; shMPC1\_2 :  
549 CCGGGCTGCCATCAATGATATGAAACTCGAGTTTCATATCATTGATGGCAGCTTTTT), and after 72  
550 hours the culture supernatant was collected, ultracentrifugated at 100,000 g for 2 hours.

551

#### 552 **Determination of oxygen consumption rate (OCR) and extracellular acidification rate** 553 **(ECAR)**

554 Measurement of oxygen consumption was performed using a Seahorse XF 24 extracellular  
555 flux analyzer (Seahorse Biosciences). 80' 000 cells were seeded in XF24 cell culture  
556 microplates and grown for 16 days. Measurement of basal and stimulation-dependent oxygen  
557 consumption was carried out at 37°C in aCSF (140 mM NaCl, 5 mM KCl, 1.2 mM KH<sub>2</sub>PO<sub>4</sub>,  
558 1.3 mM MgCl<sub>2</sub>, 1.8 mM CaCl<sub>2</sub>, 5 mM Glucose, and 15 mM Hepes, pH 7.4). Cells were  
559 infected with control shRNA or shMPC1 as described above or treated with MPC1 inhibitors  
560 Zaprinst(56), Rosiglitazone(57) , and UK5099(58) at 5, 5 and 1 µM, respectively. Cells were  
561 treated as indicated in the figure legends for 30 min before performing the assay. Basal  
562 oxygen consumption was measured before injection. At the times indicated, the following  
563 compounds were injected: oligomycin (1 µM), FCCP (4 µM), Rotenone/Antimycin A (1 µM).  
564 Each measurement loop consisted of 30 sec mixing, 2 min incubation, and 3 min  
565 measurement of oxygen consumption.

566 Determination of the extracellular acidification was carried out under the same conditions but  
567 in the absence of HEPES. The basal acidification rate was measured before injection. At the  
568 times indicated, the following compounds were injected: oligomycin (1 µM), 2-deoxyglucose  
569 (5 mM). Each measurement loop consisted of 2 min mixing, 2 min incubation, and 3 min  
570 measurement of oxygen consumption.

571

## 572 **ATP measurements**

573 ATP measurements were performed on 15-17 DIV neurons, infected with control or MPC1  
574 shRNA as described above, or treated 30 minutes prior to performing the assay with MPC  
575 inhibitors. Neurons were washed and scraped in PBS. Neurons were centrifugated at 1000  
576 rpm for 5 min and resuspended in 100 mL of CellTiter Glo reagent and agitated for 2 min to  
577 allow cell lysis. After 10 min incubation, luminescence was recorded.

578



## 579 **Calcium imaging**

580 E18.5 primary cortical neurons were isolated and seeded onto 35mm Fluorodishes. Neurons  
581 were treated with control or MPC1 shRNA at 7DIV and used for calcium imaging at 14-17  
582 DIV. Neurons were loaded with 5  $\mu$ M FuraFF or Fura2 (F14181 and F1221, Thermo Fisher  
583 Scientific) in recording buffer (150  $\mu$ M NaCl, 4.25  $\mu$ M KCl, 4  $\mu$ M NaHCO<sub>3</sub>, 1.25  $\mu$ M  
584 NaH<sub>2</sub>PO<sub>4</sub>, 1.2  $\mu$ M CaCl<sub>2</sub>, 10  $\mu$ M D-glucose, and 10  $\mu$ M HEPES at pH 7.4) with 0.02%  
585 pluronic acid, at 37  $^{\circ}$ C and 5% CO<sub>2</sub> for 30  $\mu$ min.

586 After washing, the cells were imaged in recording buffer using a custom-made imaging  
587 widefield system built on an IX71 Olympus microscope equipped with a 20 $\times$  water objective.  
588 A Xenon arc lamp with a monochromator was used for excitation, exciting FuraFF or Fura2  
589 fluorescence alternately at 340  $\mu$ nm  $\pm$  20  $\mu$ nm and 380  $\mu$ nm  $\pm$  20  $\mu$ nm and collecting  
590 emitted light through a dichroic T510lpxru or a 79003-ET Fura2/TRITC (Chroma), and a  
591 band-pass filter 535/30  $\mu$ nm. Neurons were stimulated using 10  $\mu$ M glutamate (G1626,  
592 Sigma) and 10  $\mu$ M Ionomycin was added at the end of each time course experiment as a  
593 positive control. Images were acquired using a Zyla CMOS camera (Andor) every 2–5  $\mu$ s.  
594 The images were then analysed using ImageJ.

595 Briefly, Regions of Interest (ROIs) were selected and average fluorescence intensity was  
596 measured for each channel including the background fluorescence. After subtracting the  
597 background fluorescence, the ratio between 380 and 340 nm was calculated and plotted as  
598 cytosolic [Ca<sup>2+</sup>] levels upon stimulation. The Mean amplitude was calculated for each cell  
599 using Graphpad Prism.

600

## 601 **Statistical analysis**

602 The comparison of two groups was performed using a two-sided Student's t-test or its non  
603 parametric correspondent, the Mann-Whitney test, if normality was not granted either because

604 not checked ( $n < 10$ ) or because rejected (D'Agostino and Pearson test). The comparisons of  
605 more than two groups were made using one or two ways ANOVAs followed by post-hoc  
606 tests, described in the figure legends, to identify all the significant group differences. N  
607 indicates independent biological replicates from distinct samples. Data are all represented as  
608 scatter or aligned dot plot with centre line as mean, except for western blot quantifications,  
609 which are represented as histogram bars. The graphs with error bars indicate 1 SEM (+/-) and  
610 the significance level is denoted as usual (\* $p < 0.05$ , \*\* $p < 0.01$ , \*\*\* $p < 0.001$ ). All the  
611 statistical analyses were performed using Prism7 (Graphpad version 7.0a, April 2, 2016).

612

613

## 614 **References**

615

616 1. D. Attwell, S. B. Laughlin, An energy budget for signaling in the  
617 grey matter of the brain. *J Cereb Blood Flow Metab* **21**, 1133-1145  
618 (2001).

619 2. C. N. Hall, M. C. Klein-Flugge, C. Howarth, D. Attwell, Oxidative  
620 phosphorylation, not glycolysis, powers presynaptic and postsynaptic  
621 mechanisms underlying brain information processing. *J Neurosci* **32**,  
622 8940-8951 (2012).

623 3. M. S. Goyal, M. Hawrylycz, J. A. Miller, A. Z. Snyder, M. E.  
624 Raichle, Aerobic glycolysis in the human brain is associated with  
625 development and neotenus gene expression. *Cell Metab* **19**, 49-57  
626 (2014).

627 4. S. N. Vaishnavi *et al.*, Regional aerobic glycolysis in the human  
628 brain. *Proc Natl Acad Sci U S A* **107**, 17757-17762 (2010).

629 5. D. Zala *et al.*, Vesicular glycolysis provides on-board energy for  
630 fast axonal transport. *Cell* **152**, 479-491 (2013).

631 6. C. M. Diaz-Garcia *et al.*, Neuronal Stimulation Triggers Neuronal  
632 Glycolysis and Not Lactate Uptake. *Cell Metab* **26**, 361-374 e364  
633 (2017).

634 7. G. Ashrafi, T. A. Ryan, Glucose metabolism in nerve terminals.  
635 *Curr Opin Neurobiol* **45**, 156-161 (2017).

636 8. L. Pellerin *et al.*, Activity-dependent regulation of energy  
637 metabolism by astrocytes: An update. *Glia* **55**, 1251-1262 (2007).

638 9. D. K. Bricker *et al.*, A mitochondrial pyruvate carrier required for  
639 pyruvate uptake in yeast, Drosophila, and humans. *Science* **337**, 96-  
640 100 (2012).

641 10. S. Herzig *et al.*, Identification and functional expression of the  
642 mitochondrial pyruvate carrier. *Science* **337**, 93-96 (2012).

- 643 11. P. A. Vigueira *et al.*, Mitochondrial pyruvate carrier 2  
644 hypomorphism in mice leads to defects in glucose-stimulated insulin  
645 secretion. *Cell Rep* **7**, 2042-2053 (2014).  
646 12. B. Vanderperre *et al.*, Embryonic Lethality of Mitochondrial  
647 Pyruvate Carrier 1 Deficient Mouse Can Be Rescued by a Ketogenic  
648 Diet. *PLoS Genet* **12**, e1006056 (2016).  
649 13. K. Brockmann *et al.*, Autosomal dominant glut-1 deficiency  
650 syndrome and familial epilepsy. *Ann Neurol* **50**, 476-485 (2001).  
651 14. M. Brivet *et al.*, Impaired mitochondrial pyruvate importation in a  
652 patient and a fetus at risk. *Mol Genet Metab* **78**, 186-192 (2003).  
653 15. L. Oonthonpan, A. J. Rauckhorst, L. R. Gray, A. C. Boutron, E.  
654 B. Taylor, Two human patient mitochondrial pyruvate carrier mutations  
655 reveal distinct molecular mechanisms of dysfunction. *JCI Insight* **5**,  
656 (2019).  
657 16. F. Diaz, H. Kotarsky, V. Fellman, C. T. Moraes, Mitochondrial  
658 disorders caused by mutations in respiratory chain assembly factors.  
659 *Semin Fetal Neonatal Med* **16**, 197-204 (2011).  
660 17. H. Beck, Y. Yaari, Plasticity of intrinsic neuronal properties in  
661 CNS disorders. *Nat Rev Neurosci* **9**, 357-369 (2008).  
662 18. A. S. Divakaruni *et al.*, Inhibition of the mitochondrial pyruvate  
663 carrier protects from excitotoxic neuronal death. *J Cell Biol* **216**, 1091-  
664 1105 (2017).  
665 19. N. R. Sibson *et al.*, Stoichiometric coupling of brain glucose  
666 metabolism and glutamatergic neuronal activity. *Proc Natl Acad Sci U S*  
667 *A* **95**, 316-321 (1998).  
668 20. X. Wang, C. Zhang, G. Szabo, Q. Q. Sun, Distribution of  
669 CaMKIIalpha expression in the brain in vivo, studied by CaMKIIalpha-  
670 GFP mice. *Brain Res* **1518**, 9-25 (2013).  
671 21. A. Dhir, Pentylentetrazol (PTZ) kindling model of epilepsy. *Curr*  
672 *Protoc Neurosci* **Chapter 9**, Unit9 37 (2012).  
673 22. J. Carroll, K. Martin-McGill, H. Cross, M. Hickson, A. Collinson,  
674 Outcome measurement and reporting in childhood epilepsy treated with  
675 ketogenic diet therapy: a scoping review protocol. *JBI Database*  
676 *System Rev Implement Rep* **17**, 633-639 (2019).  
677 23. E. Wirrell, S. Eckert, L. Wong-Kisiel, E. Payne, K. Nickels,  
678 Ketogenic Diet Therapy in Infants: Efficacy and Tolerability. *Pediatr*  
679 *Neurol* **82**, 13-18 (2018).  
680 24. H. C. Peters, H. Hu, O. Pongs, J. F. Storm, D. Isbrandt,  
681 Conditional transgenic suppression of M channels in mouse brain  
682 reveals functions in neuronal excitability, resonance and behavior. *Nat*  
683 *Neurosci* **8**, 51-60 (2005).  
684 25. N. Gu, H. Hu, K. Vervaeke, J. F. Storm, SK (KCa2) channels do  
685 not control somatic excitability in CA1 pyramidal neurons but can be  
686 activated by dendritic excitatory synapses and regulate their impact. *J*  
687 *Neurophysiol* **100**, 2589-2604 (2008).  
688 26. D. L. Greene, N. Hoshi, Modulation of Kv7 channels and  
689 excitability in the brain. *Cell Mol Life Sci* **74**, 495-508 (2017).  
690 27. N. A. Singh *et al.*, Mouse models of human KCNQ2 and KCNQ3  
691 mutations for benign familial neonatal convulsions show seizures and

- 692 neuronal plasticity without synaptic reorganization. *J Physiol* **586**, 3405-  
693 3423 (2008).
- 694 28. T. J. Jentsch, B. C. Schroeder, C. Kubisch, T. Friedrich, V. Stein,  
695 Pathophysiology of KCNQ channels: neonatal epilepsy and progressive  
696 deafness. *Epilepsia* **41**, 1068-1069 (2000).
- 697 29. V. Barrese, J. B. Stott, I. A. Greenwood, KCNQ-Encoded  
698 Potassium Channels as Therapeutic Targets. *Annu Rev Pharmacol*  
699 *Toxicol* **58**, 625-648 (2018).
- 700 30. H. Hu, K. Vervaeke, J. F. Storm, M-channels (Kv7/KCNQ  
701 channels) that regulate synaptic integration, excitability, and spike  
702 pattern of CA1 pyramidal cells are located in the perisomatic region. *J*  
703 *Neurosci* **27**, 1853-1867 (2007).
- 704 31. R. W. Manville, M. Papanikolaou, G. W. Abbott, M-Channel  
705 Activation Contributes to the Anticonvulsant Action of the Ketone Body  
706 beta-Hydroxybutyrate. *J Pharmacol Exp Ther* **372**, 148-156 (2020).
- 707 32. A. Alaimo, A. Villarroel, Calmodulin: A Multitasking Protein in  
708 Kv7.2 Potassium Channel Functions. *Biomolecules* **8**, (2018).
- 709 33. N. Gamper, M. S. Shapiro, Calmodulin mediates Ca<sup>2+</sup>-  
710 dependent modulation of M-type K<sup>+</sup> channels. *J Gen Physiol* **122**, 17-  
711 31 (2003).
- 712 34. M. Shahidullah, L. C. Santarelli, H. Wen, I. B. Levitan,  
713 Expression of a calmodulin-binding KCNQ2 potassium channel  
714 fragment modulates neuronal M-current and membrane excitability.  
715 *Proc Natl Acad Sci U S A* **102**, 16454-16459 (2005).
- 716 35. X. Zhou *et al.*, Calmodulin regulates KCNQ2 function in epilepsy.  
717 *Am J Transl Res* **8**, 5610-5618 (2016).
- 718 36. A. Kosenko, N. Hoshi, A change in configuration of the  
719 calmodulin-KCNQ channel complex underlies Ca<sup>2+</sup>-dependent  
720 modulation of KCNQ channel activity. *PLoS One* **8**, e82290 (2013).
- 721 37. C. Giorgi *et al.*, Mitochondrial calcium homeostasis as potential  
722 target for mitochondrial medicine. *Mitochondrion* **12**, 77-85 (2012).
- 723 38. N. Nemani *et al.*, Mitochondrial pyruvate and fatty acid flux  
724 modulate MICU1-dependent control of MCU activity. *Sci Signal* **13**,  
725 (2020).
- 726 39. A. Grenell *et al.*, Loss of MPC1 reprograms retinal metabolism to  
727 impair visual function. *Proc Natl Acad Sci U S A* **116**, 3530-3535  
728 (2019).
- 729 40. M. I. Cordero, N. Just, G. L. Poirier, C. Sandi, Effects of paternal  
730 and peripubertal stress on aggression, anxiety, and metabolic  
731 alterations in the lateral septum. *Eur Neuropsychopharmacol* **26**, 357-  
732 367 (2016).
- 733 41. K. Timper *et al.*, Mild Impairment of Mitochondrial OXPHOS  
734 Promotes Fatty Acid Utilization in POMC Neurons and Improves  
735 Glucose Homeostasis in Obesity. *Cell Rep* **25**, 383-397 e310 (2018).
- 736 42. P. Schonfeld, G. Reiser, Why does brain metabolism not favor  
737 burning of fatty acids to provide energy? Reflections on disadvantages  
738 of the use of free fatty acids as fuel for brain. *J Cereb Blood Flow*  
739 *Metab* **33**, 1493-1499 (2013).
- 740 43. P. Machler *et al.*, In Vivo Evidence for a Lactate Gradient from  
741 Astrocytes to Neurons. *Cell Metab* **23**, 94-102 (2016).

- 742 44. S. Jang *et al.*, Glycolytic Enzymes Localize to Synapses under  
743 Energy Stress to Support Synaptic Function. *Neuron* **90**, 278-291  
744 (2016).
- 745 45. V. Jakkamsetti *et al.*, Brain metabolism modulates neuronal  
746 excitability in a mouse model of pyruvate dehydrogenase deficiency.  
747 *Sci Transl Med* **11**, (2019).
- 748 46. H. S. Wang *et al.*, KCNQ2 and KCNQ3 potassium channel  
749 subunits: molecular correlates of the M-channel. *Science* **282**, 1890-  
750 1893 (1998).
- 751 47. C. Biervert *et al.*, A potassium channel mutation in neonatal  
752 human epilepsy. *Science* **279**, 403-406 (1998).
- 753 48. B. C. Schroeder, C. Kubisch, V. Stein, T. J. Jentsch, Moderate  
754 loss of function of cyclic-AMP-modulated KCNQ2/KCNQ3 K<sup>+</sup> channels  
755 causes epilepsy. *Nature* **396**, 687-690 (1998).
- 756 49. H. Watanabe *et al.*, Disruption of the epilepsy KCNQ2 gene  
757 results in neural hyperexcitability. *J Neurochem* **75**, 28-33 (2000).
- 758 50. M. Campanella, N. Parker, C. H. Tan, A. M. Hall, M. R. Duchon,  
759 IF(1): setting the pace of the F(1)F(o)-ATP synthase. *Trends Biochem*  
760 *Sci* **34**, 343-350 (2009).
- 761 51. E. Gebara *et al.*, Heterogeneity of Radial Glia-Like Cells in the  
762 Adult Hippocampus. *Stem Cells* **34**, 997-1010 (2016).
- 763 52. C. B. Mishra *et al.*, The anti-epileptogenic and cognition  
764 enhancing effect of novel 1-[4-(4-benzo [1, 3] dioxol-5-ylmethyl-  
765 piperazin-1-yl)-phenyl]-3-phenyl-urea (BPPU) in pentylenetetrazole  
766 induced chronic rat model of epilepsy. *Biomed Pharmacother* **105**, 470-  
767 480 (2018).
- 768 53. P. Megevand, C. Quairiaux, A. M. Lascano, J. Z. Kiss, C. M.  
769 Michel, A mouse model for studying large-scale neuronal networks  
770 using EEG mapping techniques. *Neuroimage* **42**, 591-602 (2008).
- 771 54. L. Sheybani *et al.*, Electrophysiological Evidence for the  
772 Development of a Self-Sustained Large-Scale Epileptic Network in the  
773 Kainate Mouse Model of Temporal Lobe Epilepsy. *J Neurosci* **38**, 3776-  
774 3791 (2018).
- 775 55. J. Faure *et al.*, Exosomes are released by cultured cortical  
776 neurones. *Mol Cell Neurosci* **31**, 642-648 (2006).
- 777 56. J. Du *et al.*, Inhibition of mitochondrial pyruvate transport by  
778 zaprinast causes massive accumulation of aspartate at the expense of  
779 glutamate in the retina. *J Biol Chem* **288**, 36129-36140 (2013).
- 780 57. A. S. Divakaruni *et al.*, Thiazolidinediones are acute, specific  
781 inhibitors of the mitochondrial pyruvate carrier. *Proc Natl Acad Sci U S*  
782 *A* **110**, 5422-5427 (2013).
- 783 58. A. P. Halestrap, The mitochondrial pyruvate carrier. Kinetics and  
784 specificity for substrates and inhibitors. *Biochem J* **148**, 85-96 (1975).
- 785  
786

787 **Acknowledgments**

788 We would like express our sincere thanks to Drs. Nika Danial, Timothy Ryan, Garry Yellen  
789 and all members of the Martinou lab for helpful scientific discussion during the course of this  
790 work. We also wish to extend our special thanks to Dr. Fabien Lanté and Dr. Anita Lüthi for  
791 advices on the electrophysiology experiments, Dr. Kinsey Maundrell for help in reviewing the  
792 manuscript, to Professor Nicolas Toni (University of Lausanne) who kindly provided us the  
793 GFAP-CreERT2 mouse, to Professor Ivan Rodriguez (University of Geneva) who kindly  
794 provided us with the Ai14 reporter mouse.

795

796 **Author contributions**

797 JCM and ADLR conceived the project. ADLR performed and/or participated in all the *in-vivo*  
798 experiments, and analysed the data. ML designed, performed and analysed all experiments  
799 involving neuronal primary cultures and synaptosomes. SA designed, performed and analysed  
800 the electrophysiology experiments, under the supervision of CS. TM and AC performed the  
801 experiments using calcium imaging. ERF designed and performed behavioural analysis, under  
802 the supervision of CS. SM performed mouse breeding and genotyping and participated in  
803 some in vivo experiments. PS performed some of the calcium imaging experiment on cultured  
804 neurones, under the supervision of MD. AK and CQ performed EEGs. ET and JRu provided  
805 the MPC1 Flox/Flox mice and advices. JMN supervised statistical analysis. JCM, ADLR, ML  
806 and SA wrote the manuscript with input from all other authors.

807

808 **Funding agencies**

809 Swiss National Science Foundation [31003A\_179421/1 /1 and The Kristian Gerhard Jebsen  
810 Foundation to J.-C.M; Requip support from the Swiss National Science Fondation for the  
811 acquisition of the Seahorse apparatus (SNF 316030\_145001). Spanish Ministerio de

812 Economía y Competitividad (MINECO, BFU2017-84490-P and RYC-2015-18545) to PM.

813 **Conflict of interest statement.** None declared.

814

815 **Data availability**

816 The data that are supporting the findings of this study are available from the corresponding

817 authors upon request .

818

819 **Figure legends**

820

821 **Figure 1. MPC-deficient neurons display defects in mitochondrial respiration and**  
822 **membrane potential. A)** Profile and quantification of oxygen consumption rates (OCR)  
823 cortical neurons expressing either shCtrl, or shMPC1\_1 and shMPC1\_2 for 7 days, or in the  
824 presence of Zaprinast (5 $\mu$ M, 1 hour). Data were obtained using the Seahorse XF analyzer.  
825 Assays were performed in the presence of pyruvate (5 mM) and glucose (5 mM) as carbon  
826 sources. Quantification of basal OCR is expressed as ratio of ShCtrl. N=10,7,9,7 and 2  
827 independent experiments. N=33,11,25 and 6 independent experiments. One-way  
828 ANOVA+Tukey's post-hoc test (shCtrl vs Zaprinast p=0.0001, shCtrl vs shMPC1\_1  
829 p=0.0001, shCtrl vs shMPC1\_2 p=0.0013). **B)** ATP content in MPC-deficient cortical neurons  
830 treated with either shCtrl, Zaprinast or shMPC1\_1 and shMPC1\_2. FCCP (4  $\mu$ M) treatment  
831 reveals the non-mitochondrial ATP. N=10,7,9,7 and 2 independent experiments. One-way  
832 ANOVA+Tukey's post-hoc test (shCtrl vs Zaprinast p=0.0006, shCtrl vs shMPC1\_1  
833 p=0.0223, shCtrl vs shMPC1\_2 p=0.0242, shCtrl vs FCCP p=0.0001). **C)** Mitochondrial  
834 membrane potential of MPC-deficient cortical neurons. Neurons were incubated with  
835 Mitotracker red (Mtr) (1  $\mu$ M) prior fixation, immunostained for  $\beta$ III tubulin (neuron) and  
836 TOM20 (mitochondria). Quantification of Mitotracker red fluorescence in each  $\beta$ III tubulin-  
837 positive cell (red) was reported to TOM20 signal (green). N=15 neurons from 3 independent  
838 experiments. Unpaired t test (shCtrl vs shMPC1 p=0.0001). **D)** Profile and quantification of  
839 oxygen consumption rates (OCR) in cortical neurons expressing shCtrl or shMPC1\_1 for 7  
840 days. Data were obtained using the Seahorse XF analyzer. Assays were performed in the  
841 presence of pyruvate (5 mM) and glucose (5 mM) as carbon sources + 10 mM  $\beta$ HB when  
842 indicated. Quantification of basal OCR is expressed as ratio of control condition shCtrl. N=12  
843 independent experiment. One-way ANOVA+Holm Sidak's post-hoc test (shCtrl vs shMPC1  
844 p=0.0001, shMPC1 vs shMPC1+ $\beta$ HB p=0.0002). **E)** ATP content in MPC-deficient cortical  
845 neurons treated with shCtrl or shMPC1 in presence or absence of 10 mM  $\beta$ HB. FCCP (4  $\mu$ M)  
846 treatment reveals the non-mitochondrial ATP. N=10, 9, 10, 9 independent experiments. One-  
847 way ANOVA+Holm Sidak's post-hoc test (shCtrl vs shMPC1 p=0.0145, shMPC1 vs  
848 shMPC1+ $\beta$ HB p=0.0143, shCtrl vs FCCP p=0.0001). **F)** Cortical neurons were incubated  
849 with TMRE (50 nM) +/-  $\beta$ HB (10 mM) for 30 min and recorded by live microscopy. Neurons  
850 were incubated with DMSO or Zaprinast (5  $\mu$ M) 2.5 min after the beginning of the  
851 acquisition and recorded for 5 min prior FCCP injection. N=15 independent experiments.  
852 One-way ANOVA+Holm Sidak's post-hoc test (shCtrl vs Zaprinast p=0.0028, Zaprinast vs  
853 Zaprinast+ $\beta$ HB p=0.0008).

854

855 **Figure 2. Generation of mice with an inducible deletion of the MPC1 gene in adult**  
856 **glutamatergic neurons. A)** Strategies used to generate CamKII $\alpha$ -Cre<sub>ERT2</sub>/MPC1<sup>Flox</sup> mice.  
857 Upon Tamoxifen injection, expression of the Cre recombinase in CamKII $\alpha$  glutamatergic  
858 neurons drives deletion of the MPC1 gene. These mice are referred to as neuro-MPC1-KO or  
859 neuro-MPC1-WT when they are CamCre- (1. Glutamatergic neuron; 2. Astrocytes; 3.  
860 Inhibitory neuron). **B)** Immunostaining of MPC1 (red) in cortical sections from neuro-MPC1-  
861 WT and neuro-MPC1-KO mice (scale bar: 100  $\mu$ m). **C)** Western blot analysis of whole  
862 cortex, synaptosome lysates and heavy organelles (mainly mitochondria), obtained from  
863 brains of neuro-MPC1-WT and neuro-MPC1-KO mice using neuronal (Synaptophysin,  
864 tyrosine hydroxylase, CamKII $\alpha$ ) and astroglial markers (GFAP) as well as mitochondrial  
865 markers (MPC1, MPC2 and VDAC). Note that synaptosomes are enriched for CamKII $\alpha$ , a  
866 marker of excitatory neurons. Quantification (right panel) shows that except for MPC1 and  
867 MPC2, the content of these markers is similar in WT and KO preparations. N=6 independent



868 neuro-MPC1-WT and neuro-MPC1-KO mice. Mann-Whitney test ((6) neuro-MPC1-WT vs  
869 neuro-MPC1-KO p=0.0286, (7) neuro-MPC1-WT vs neuro-MPC1-KO p=0.0152).

870

871 **Figure 3. Neuro-MPC1-KO mice are highly sensitive to pro-convulsant drugs and**  
872 **develop acute epileptic-like seizures.** **A)** Schematic description of the PTZ kindling  
873 protocol. **B)** Seizure severity scores reflecting the different clinical symptoms as indicated,  
874 obtained for neuro-MPC1-WT or neuro-MPC1-KO. N=8 independent neuro-MPC1-WT and  
875 neuro-MPC1-KO mice. Two way ANOVA (F(7,70)=19, p=0.0001). **C)** Illustration of the  
876 recording setups in awake mice indicating the position of surface EEG electrodes and  
877 representative example of a seizure recorded in a neuro-MPC1-KO mouse after injection of  
878 35mg/kg PTZ during surface EEG recordings. The inset shows an example of fast ripples  
879 generated during an ictal epileptic discharge. **D-I)** GCaMP6S calcium imaging of the CA1  
880 area from hippocampal slices in the presence of Carbachol (50 $\mu$ M) and PTZ (2mM). Slices  
881 were prepared from WT animals (top, black) or from KO animals with no pre-treatment  
882 (bottom, red). **D)** Ca<sup>2+</sup> sweeps recorded in four representative GCaMP6S-expressing neurons.  
883 **E)** Raster plots of Ca<sup>2+</sup> transient onsets extracted from all recorded neurons in a given slice.  
884 **F)** Cumulative distribution of the frequency of the calcium events in all the recorded neurons.  
885 N=7, 12 independent experiments. Kolmogorov-Smirnov test (WT vs KO p=0.0001). **G)**  
886 Cumulative distribution of the occurrence of neuronal co-activations exceeding chance levels  
887 as a function of time N=7, 12 independent experiments. Kolmogorov-Smirnov test (WT vs  
888 KO p=0.0344). Amplitude (**H**), and duration (**I**) of the calcium events recorded in all neurons  
889 of the hippocampus. N=7, 12 independent experiments. Mann-Whitney test (Amplitude: WT  
890 vs KO p=0.5918; Duration: WT vs KO p=0.9182).

891

892 **Figure 4. Ketogenic diet prevents the epileptic phenotype of neuro-MPC1-KO mice.** **A)**  
893 Effect of the ketogenic diet (KD) on PTZ-induced seizure. All neuro-MPC1-KO mice were  
894 maintained on the Standard (SD) or ketogenic (KD) diet for 7 days prior to challenge with a  
895 single dose of PTZ. Clinical scores were assessed directly following injection. N=7  
896 independent neuro-MPC1-KO mice. Mann-Whitney (neuro-MPC1-KO SD vs neuro-MPC1-  
897 KO KD p=0.0008). **B)** Effects 1%  $\beta$ HB in the drinking water for 7 days, overnight fasting or  
898 ip injection of  $\beta$ HB 15 min before administration of PTZ into neuro-MPC1-KO mice. N=4  
899 independent neuro-MPC1-KO mice. One-way ANOVA+Holm Sidak's post-hoc test (Vehicle  
900 vs all conditions p=0.0001). **C)** Effect of  $\beta$ HB on PTZ-induced seizure: mice were injected ip  
901 with 1g/kg  $\beta$ HB, 15 minutes before each PTZ injection and scored for clinical symptoms.  
902 N=6 independent mice. Two-way ANOVA+Holm Sidak's post-hoc test (F(10, 75)=8, Neuro-  
903 MPC1-WT vs neuro-MPC1-KO, neuro-MPC1-KO vs neuro-MPC1-KO +  $\beta$ HB p=0.0001).

904

905 **Figure 5. MPC1 deletion increases intrinsic excitability in CA1 pyramidal cells.** **A)**  
906 Example voltage responses elicited in CA1 pyramidal cells from wild-type (WT) and MPC1-  
907 CamKII-KO (KO) by injection of current ramps (protocol at the bottom, only three of six  
908 ramps displayed). **B)** Frequency-current (F-I) relationship of action potential discharges,  
909 indicating higher spiking frequency in KO cells (Two-way ANOVA, F(1, 156) 33.43,  
910 p<0.0001). **C)** The rheobase was reduced in KO cells (Mann-Whitney test, U=53.5,  
911 p=0.0406). **D)** KO cells exhibited more hyperpolarized threshold potential (unpaired t test,  
912 t=2.856, p=0.0084). **E)** Example traces showing lack of changes in WT cell firing after bath  
913 application of the ketone body  $\beta$ -hydroxybutyrate ( $\beta$ HB, 2 mM, >20 min exposure). **F)**  
914 Average firing frequency elicited by the 3<sup>rd</sup> ramp of current injections in WT cells in control  
915 condition (5 min after whole-cell establishment) and after 20 min of either no drug exposure  
916 or  $\beta$ HB application (no drug: paired t test, t=0.664, p=0.5362;  $\beta$ HB: paired t test, t=2.1,  
917 p=0.0804). **G, H)** Example traces and summary graphs indicating significant reduction in KO

918 cell firing after  $\beta$ HB application (no drug: paired t test,  $t=0.4691$ ,  $p=0.6634$ ;  $\beta$ HB: paired t  
919 test,  $t=5.339$ ,  $p=0.0005$ ). **I**) Example traces of cell firing in control and after bath application  
920 of XE991 (10  $\mu$ M) in WT and KO neurons. **J**) Average firing frequency elicited by the 2<sup>nd</sup>  
921 ramp of current injections in control and after XE991 application, indicating increased  
922 excitability in WT cells (paired t test,  $t=3.735$ ,  $p=0.0057$ ). XE991 was ineffective in KO cells,  
923 in which subsequent application of  $\beta$ HB also failed to modulate excitability (One-way  
924 ANOVA,  $F(1.69, 11.89)=4.76$ ,  $p=0.0347$ , Holm-Sidak's multiple comparison  $p>0.05$ ). **K**)  
925 XE991 significantly reduced the rheobase of WT cells (paired t test,  $t=11$ ,  $p<0.001$ ), but not  
926 of KO cells, in which subsequent  $\beta$ HB application was also ineffective (One-way ANOVA,  
927  $F(1.785, 12.5)=2.99$ ,  $p=0.091$ ). **L**) XE991 induced a shift in the threshold potential of WT  
928 cells (paired t test,  $t=6.001$ ,  $p=0.0003$ ), but did not affect KO cells, in which subsequent  $\beta$ HB  
929 application was also ineffective (One-way ANOVA,  $F(1.812, 12.68)=1.78$ ,  $p=0.209$ ). **M**)  
930 Example traces of KO cell firing elicited by a current ramp (300 pA max amplitude, APs are  
931 trimmed) in control and after  $\beta$ HB exposure, with expanded portion at the bottom indicating  
932 mAHP measurement. **N**) Summary graph of mAHP values in WT and KO cells in control and  
933 after  $\beta$ HB exposure, indicating significant increase in KO (unpaired t test,  $t=2.89$ ,  $p=0.0179$ ).  
934 **O**) Example traces of KO cell firing before and after application of retigabine (10  $\mu$ M), and  
935 subsequent  $\beta$ HB superfusion (2 mM). **P**) F-I relationships in KO cells, indicating reduced  
936 spiking frequency after retigabine application, with no additional effect of  $\beta$ HB (Two-way  
937 repeated measures ANOVA,  $F(2, 48)=89.15$ ,  $p<0.0001$ ).

938

939 **Figure 6. Defect in calcium homeostasis.** **A**) Mean fluorescence signal intensity of cortical  
940 neurons loaded with furaFF-AM stimulated with 10  $\mu$ M glutamate (dashed black arrow) prior  
941 the addition of ionomycin (red arrow) to reveal the neuronal calcium stock. **B**, **C**) Graph  
942 showing the quantifications of control neurons, MPC-depleted neurons and MPC-depleted  
943 neurons+ $\beta$ HB showing an elevated level of cytosolic calcium in MPC-deficient stimulated  
944 neurons measured by FuraFF-AM (**B**) or Fura2-AM (**C**).  $N>15$  neurons per condition from 3  
945 independent experiments. One-way ANOVA+Holm Sidak's post-hoc test ((**B**) shCtrl vs  
946 shMPC1  $p=0.0286$ , shMPC1 vs shMPC1+ $\beta$ HB  $p=0.0001$ ; (**C**) shCtrl vs shMPC1  $p=0.0169$ ,  
947 shMPC1 vs shMPC1+ $\beta$ HB  $p=0.0001$ ). **D**) Fluorescence signal intensity of control, MPC-  
948 deficient, and RU360-treated cortical neurons permeabilized with pluronic acid (0.02%).  
949 Neurons were loaded with Fura2-AM, stimulated with KCl 50 mM prior addition of fCCP to  
950 reveal the mitochondrial stocks of calcium. **E**, **F**) Quantification of calcium increased upon  
951 depolarization (**E**, ratio of the fluorescence peak after adding KCl to the mean of the 10 first  
952 basal measurement) and the amount of mitochondrial calcium released by fCCP (**F**, ratio of  
953 the fluorescence peak after adding fCCP to the lowest point during wash) in normal, MPC-  
954 deficient neurons and neurons+RU360.  $N>13$  neurons per condition from 3 independent  
955 experiments. One-way ANOVA+Holm Sidak's post-hoc test ((**E**) Ctrl vs Zaprinast  
956  $p=0.0389$ , Ctrl vs UK-5099  $p=0.0054$ , Ctrl vs Rosiglitazone  $p=0.0001$ , Ctrl vs RU360  
957  $p=0.0001$ ; (**F**) Ctrl vs all conditions  $p=0.0001$ ). **G**, **H**) Example traces and F-I relationship in  
958 WT cells with standard intracellular solution and with a solution containing the MCU  
959 inhibitor RU360 (1 or 10  $\mu$ M), which increased neuronal firing (10  $\mu$ M: Two-way ANOVA,  
960  $F(1, 72) = 26.03$ ,  $p<0.0001$ ). **I**, **J**) Lack of RU360 (10  $\mu$ M) effect on neuronal firing in KO  
961 cells (Two-way ANOVA,  $F(1, 72) = 0.03607$ ,  $p = 0.8499$ ). **K**) Example traces of WT cell  
962 firing elicited by a current ramp (300 pA max amplitude, APs are trimmed) in control  
963 condition and with RU360, with expanded portion at the bottom indicating mAHP  
964 measurement. **L**) Summary graph of mAHP values in control condition and with RU360,  
965 indicating significant reduction in WT (unpaired t test,  $t = 2.352$ ,  $p = 0.0392$ ). **M**, **N**) Example  
966 traces and F-I relationship in WT cells infused with RU360 (10  $\mu$ M) and subsequently  
967 exposed to  $\beta$ HB (2 mM,  $>20$  min exposure), which decreased neuronal firing (Two-way

968 ANOVA,  $F(1, 28) = 17.69$ ,  $p = 0.0001$ ) and augmented mAHP (inset, paired t test,  $t = 2.336$ ,  
969  $p = 0.0477$ ).  
970

A

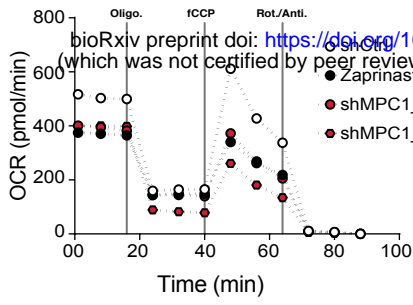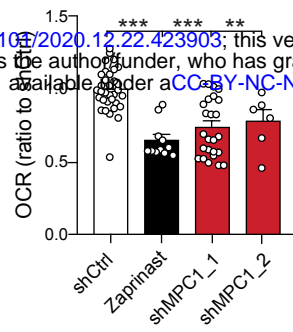

B

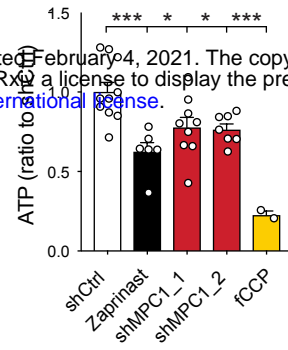

C

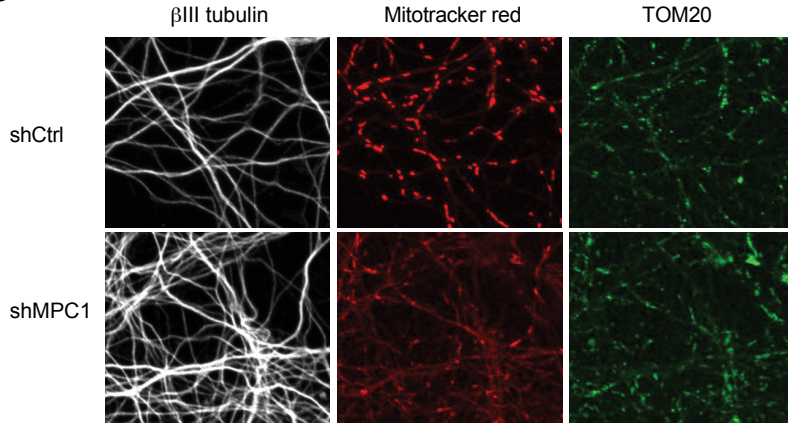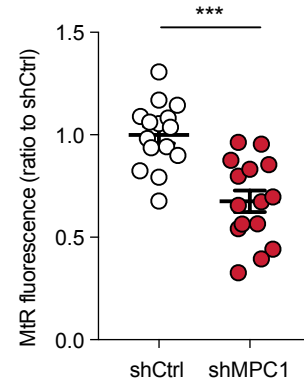

D

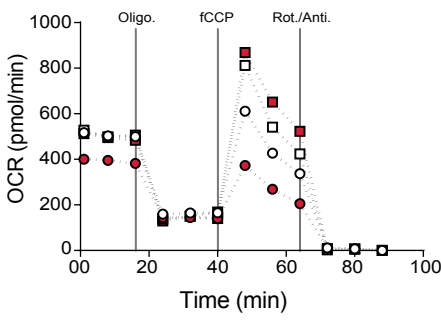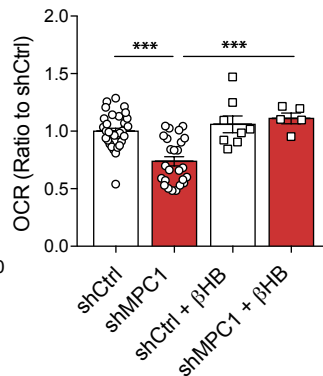

E

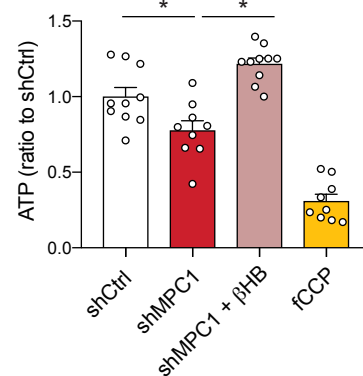

F

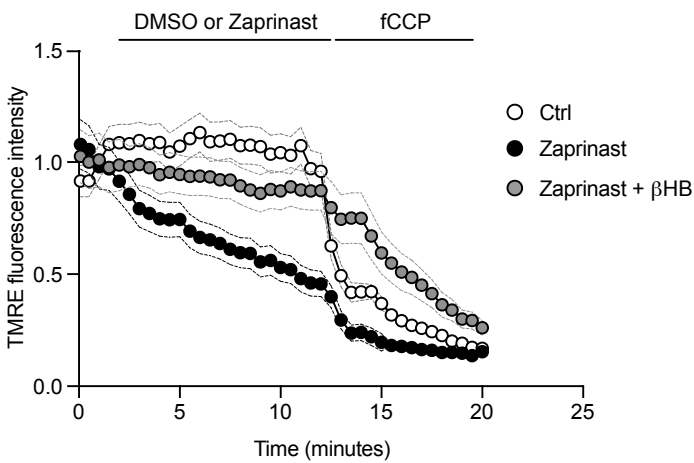

Figure 1

A

Camk2 $\alpha$ -Cre<sup>+</sup>/MPC1<sup>Fllox</sup> Mice

bioRxiv preprint doi: <https://doi.org/10.1101/2020.12.22.423903>; this version posted February 4, 2021. The copyright holder for this preprint (which was not certified by peer review) is the author/funder, who has granted bioRxiv a license to display the preprint in perpetuity. It is made available under aCC-BY-NC-ND 4.0 International license.

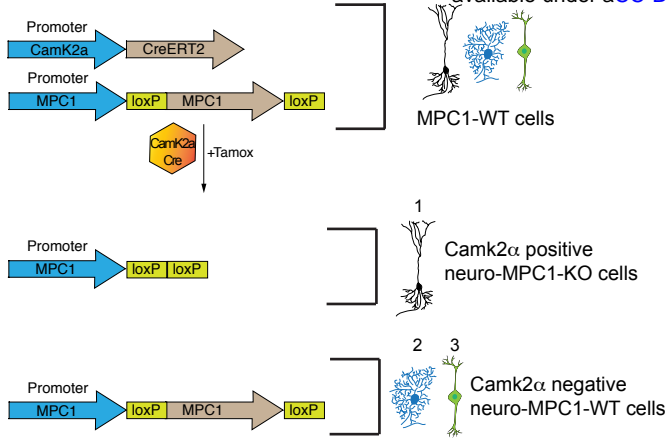

B

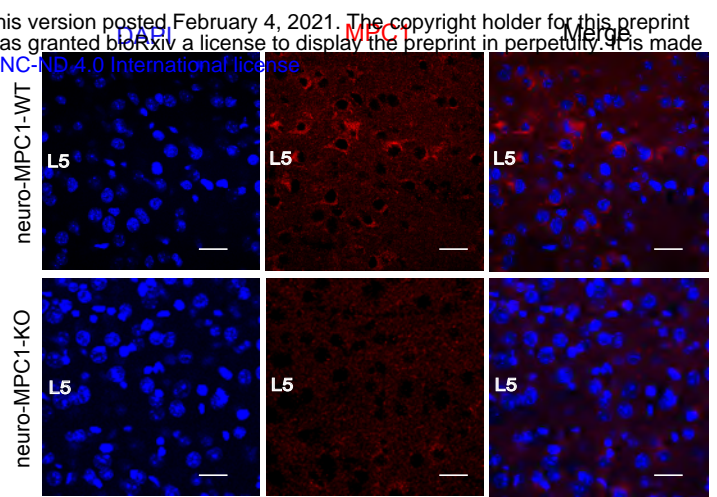

C

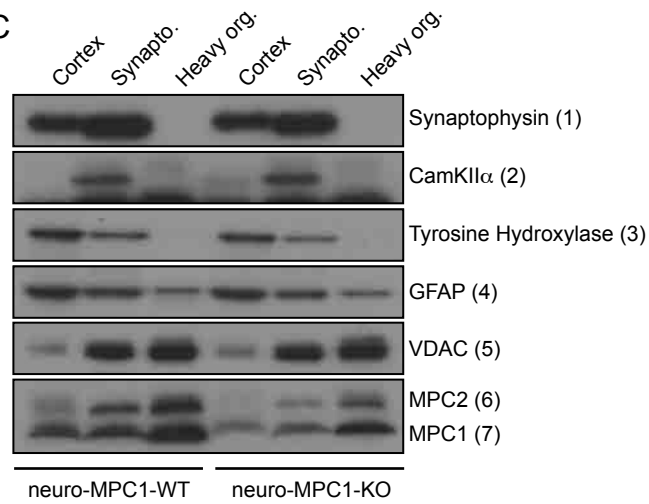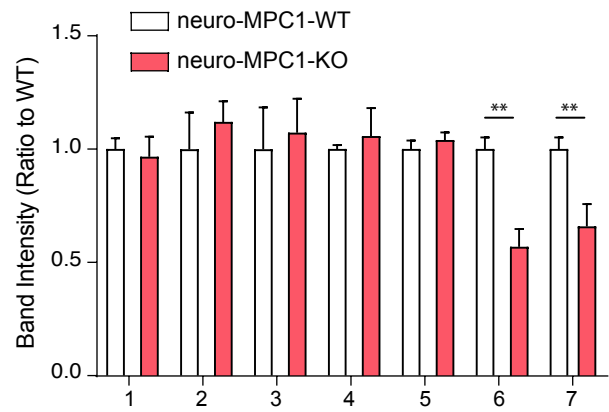

Figure 2

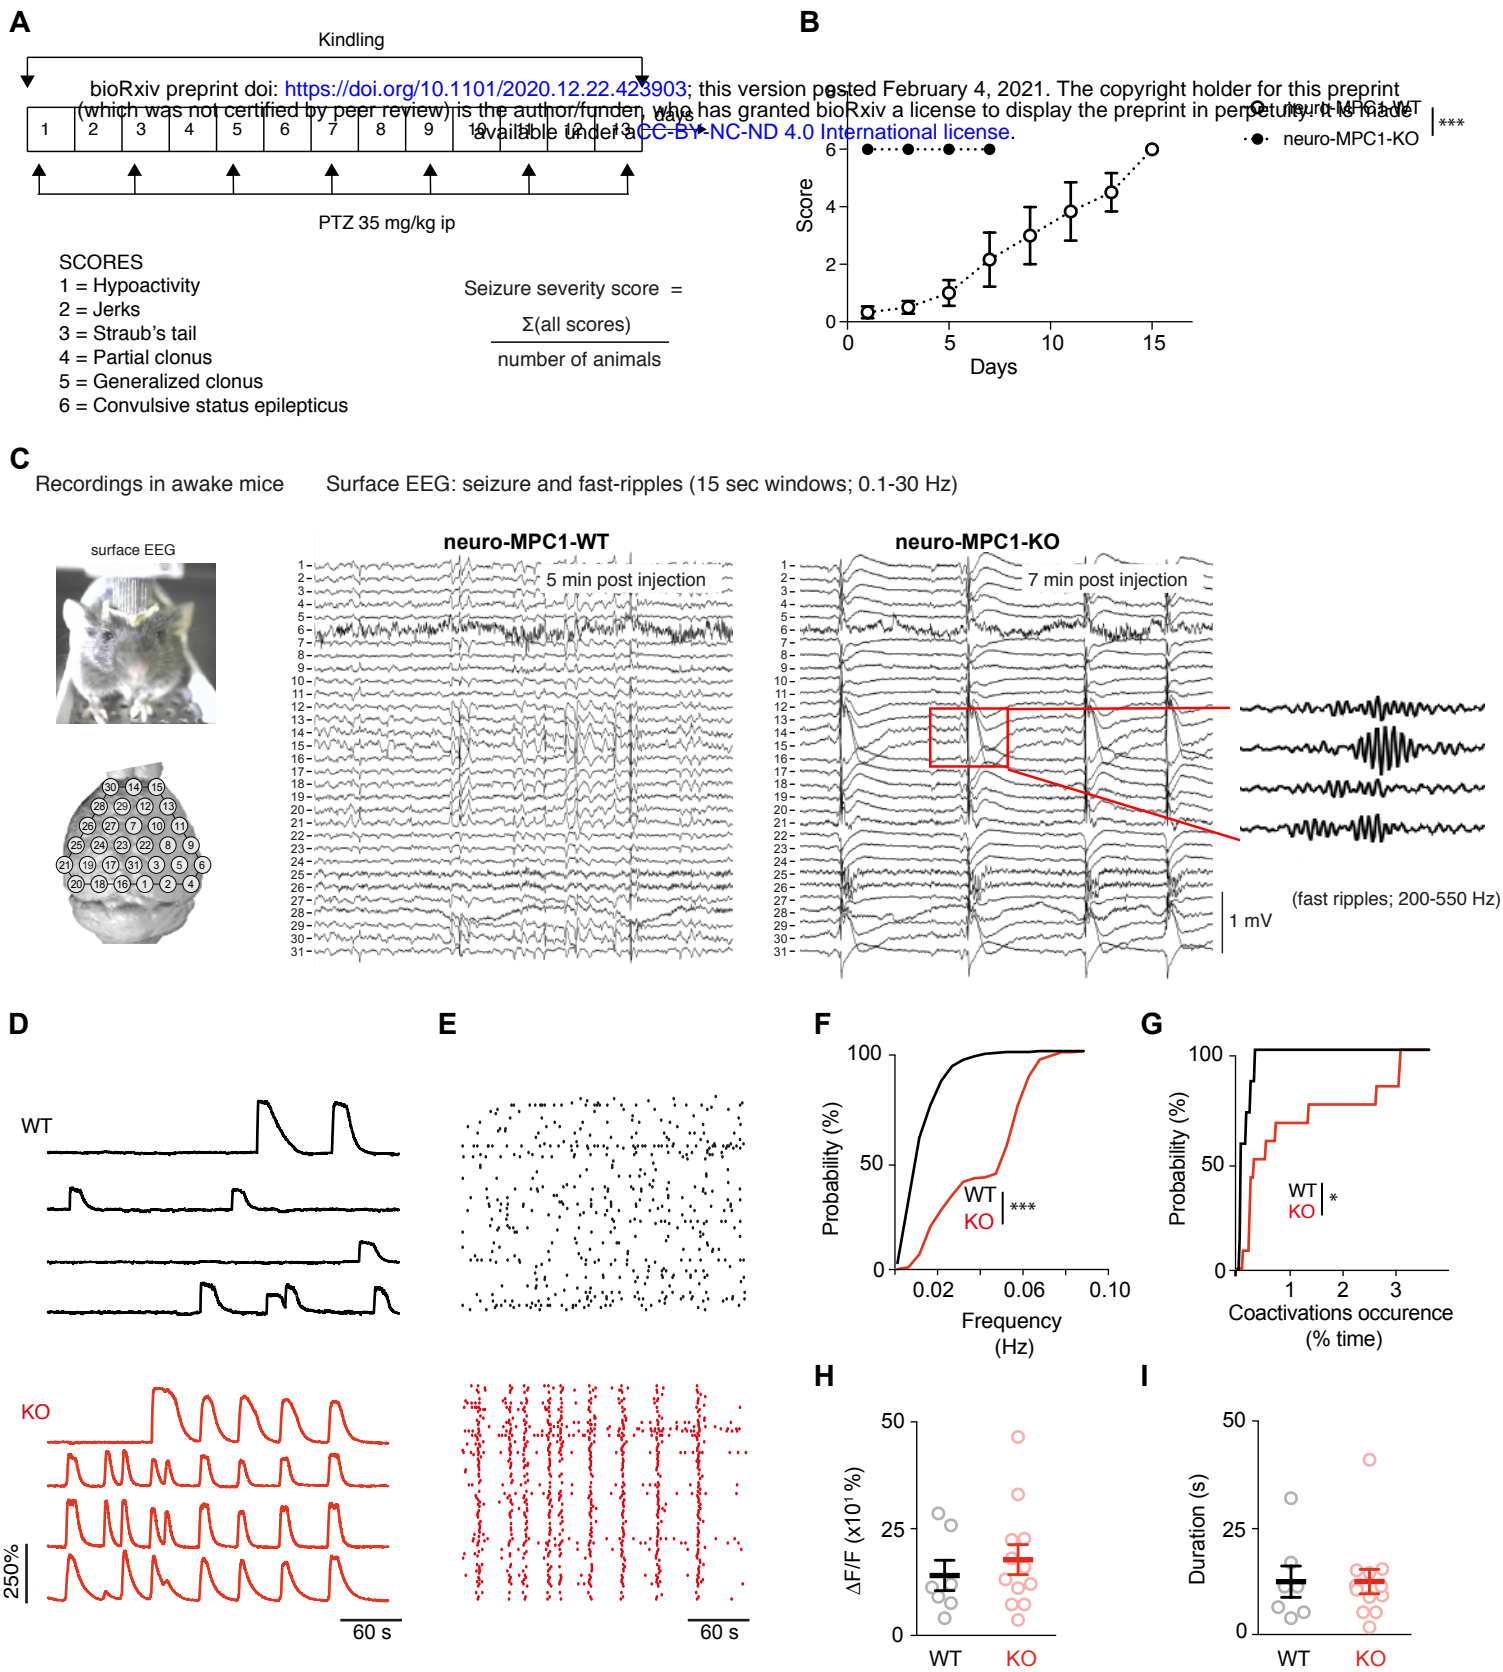

Figure 3

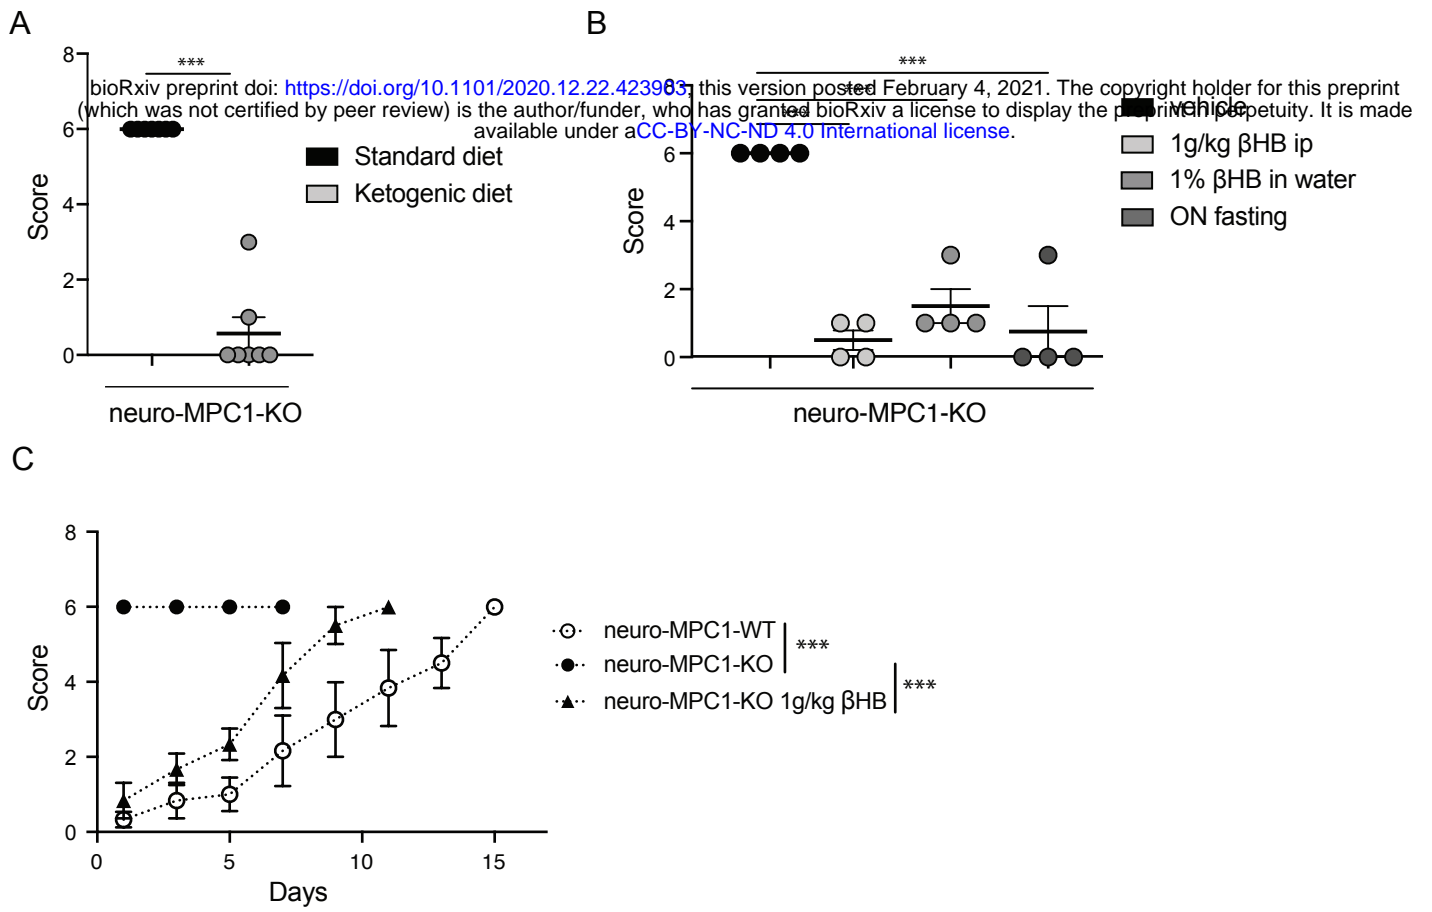

Figure 4

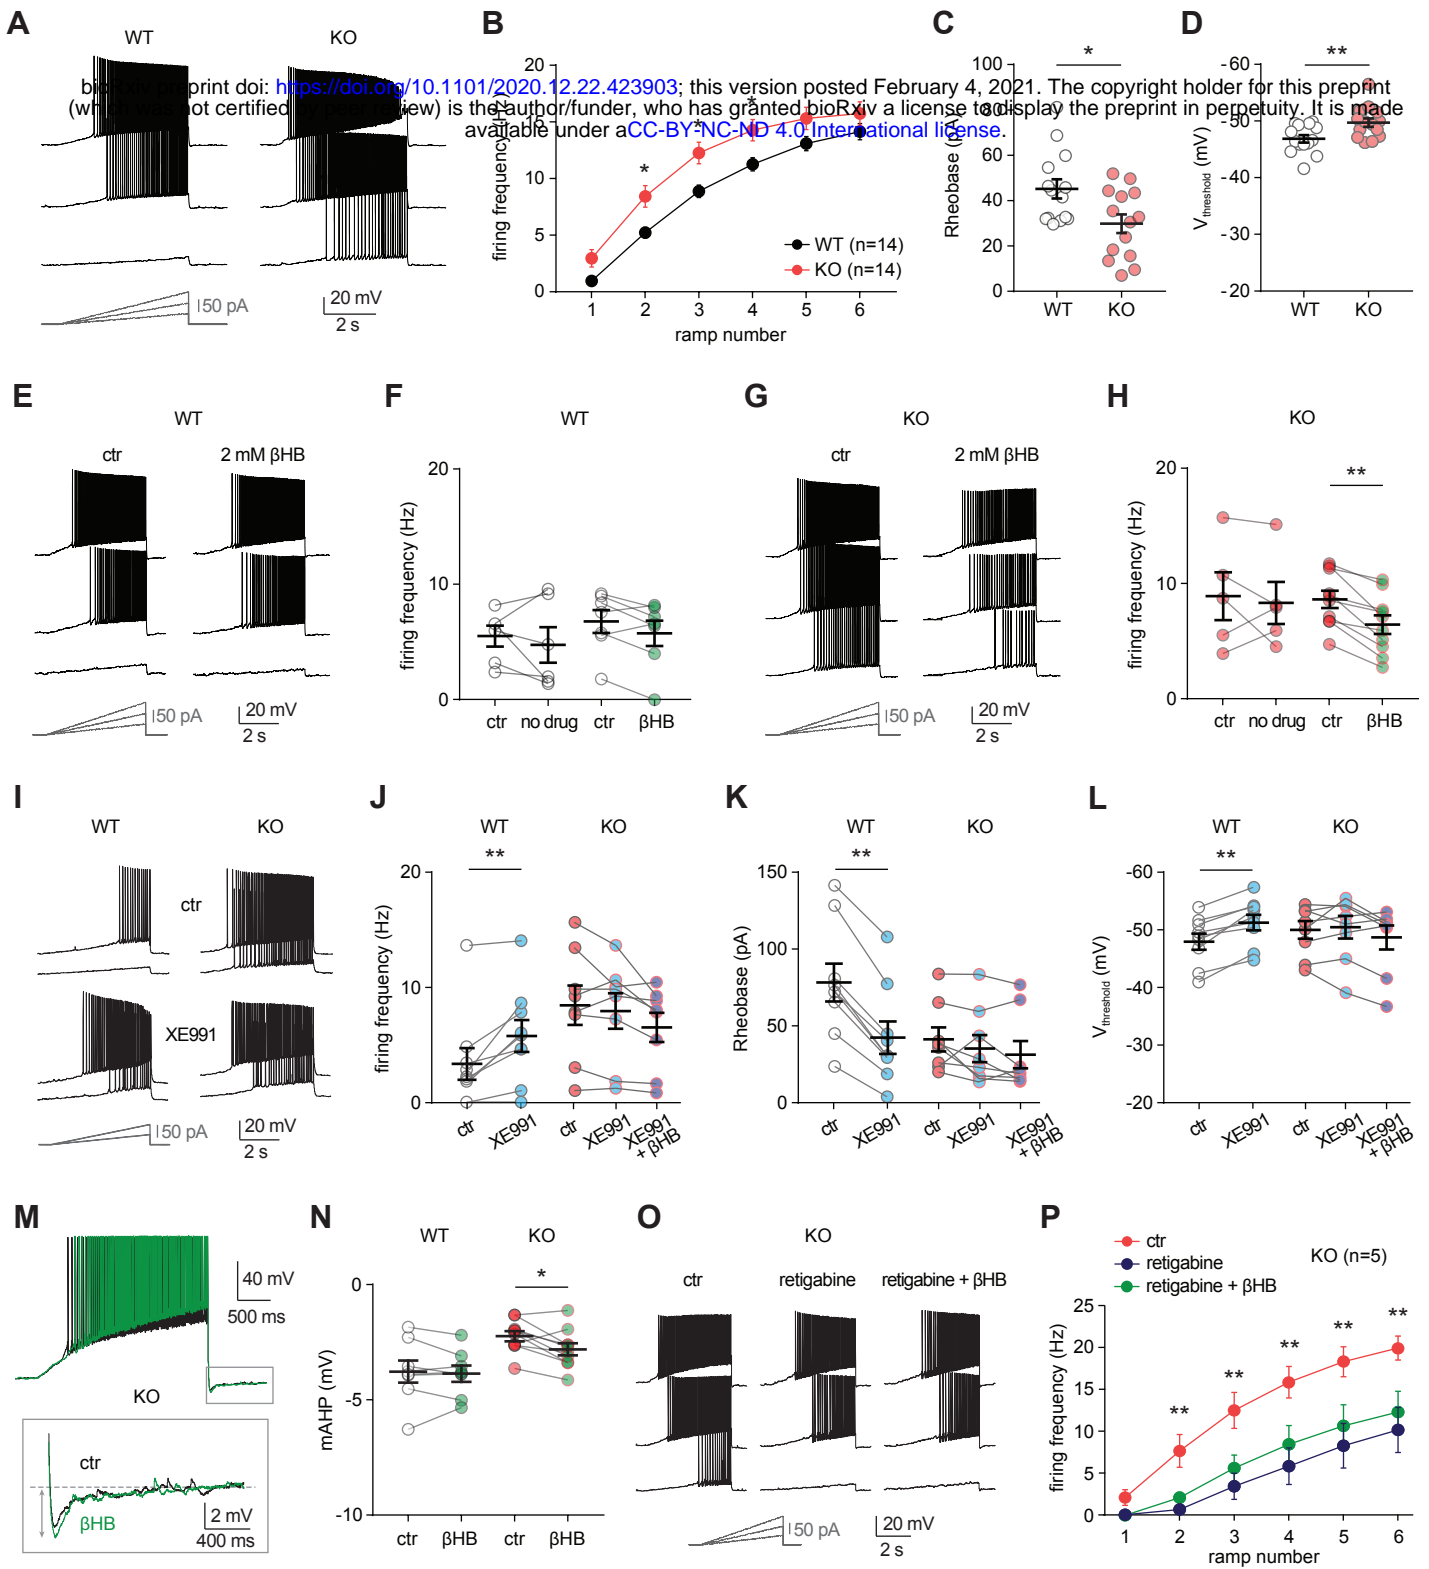

Figure 5



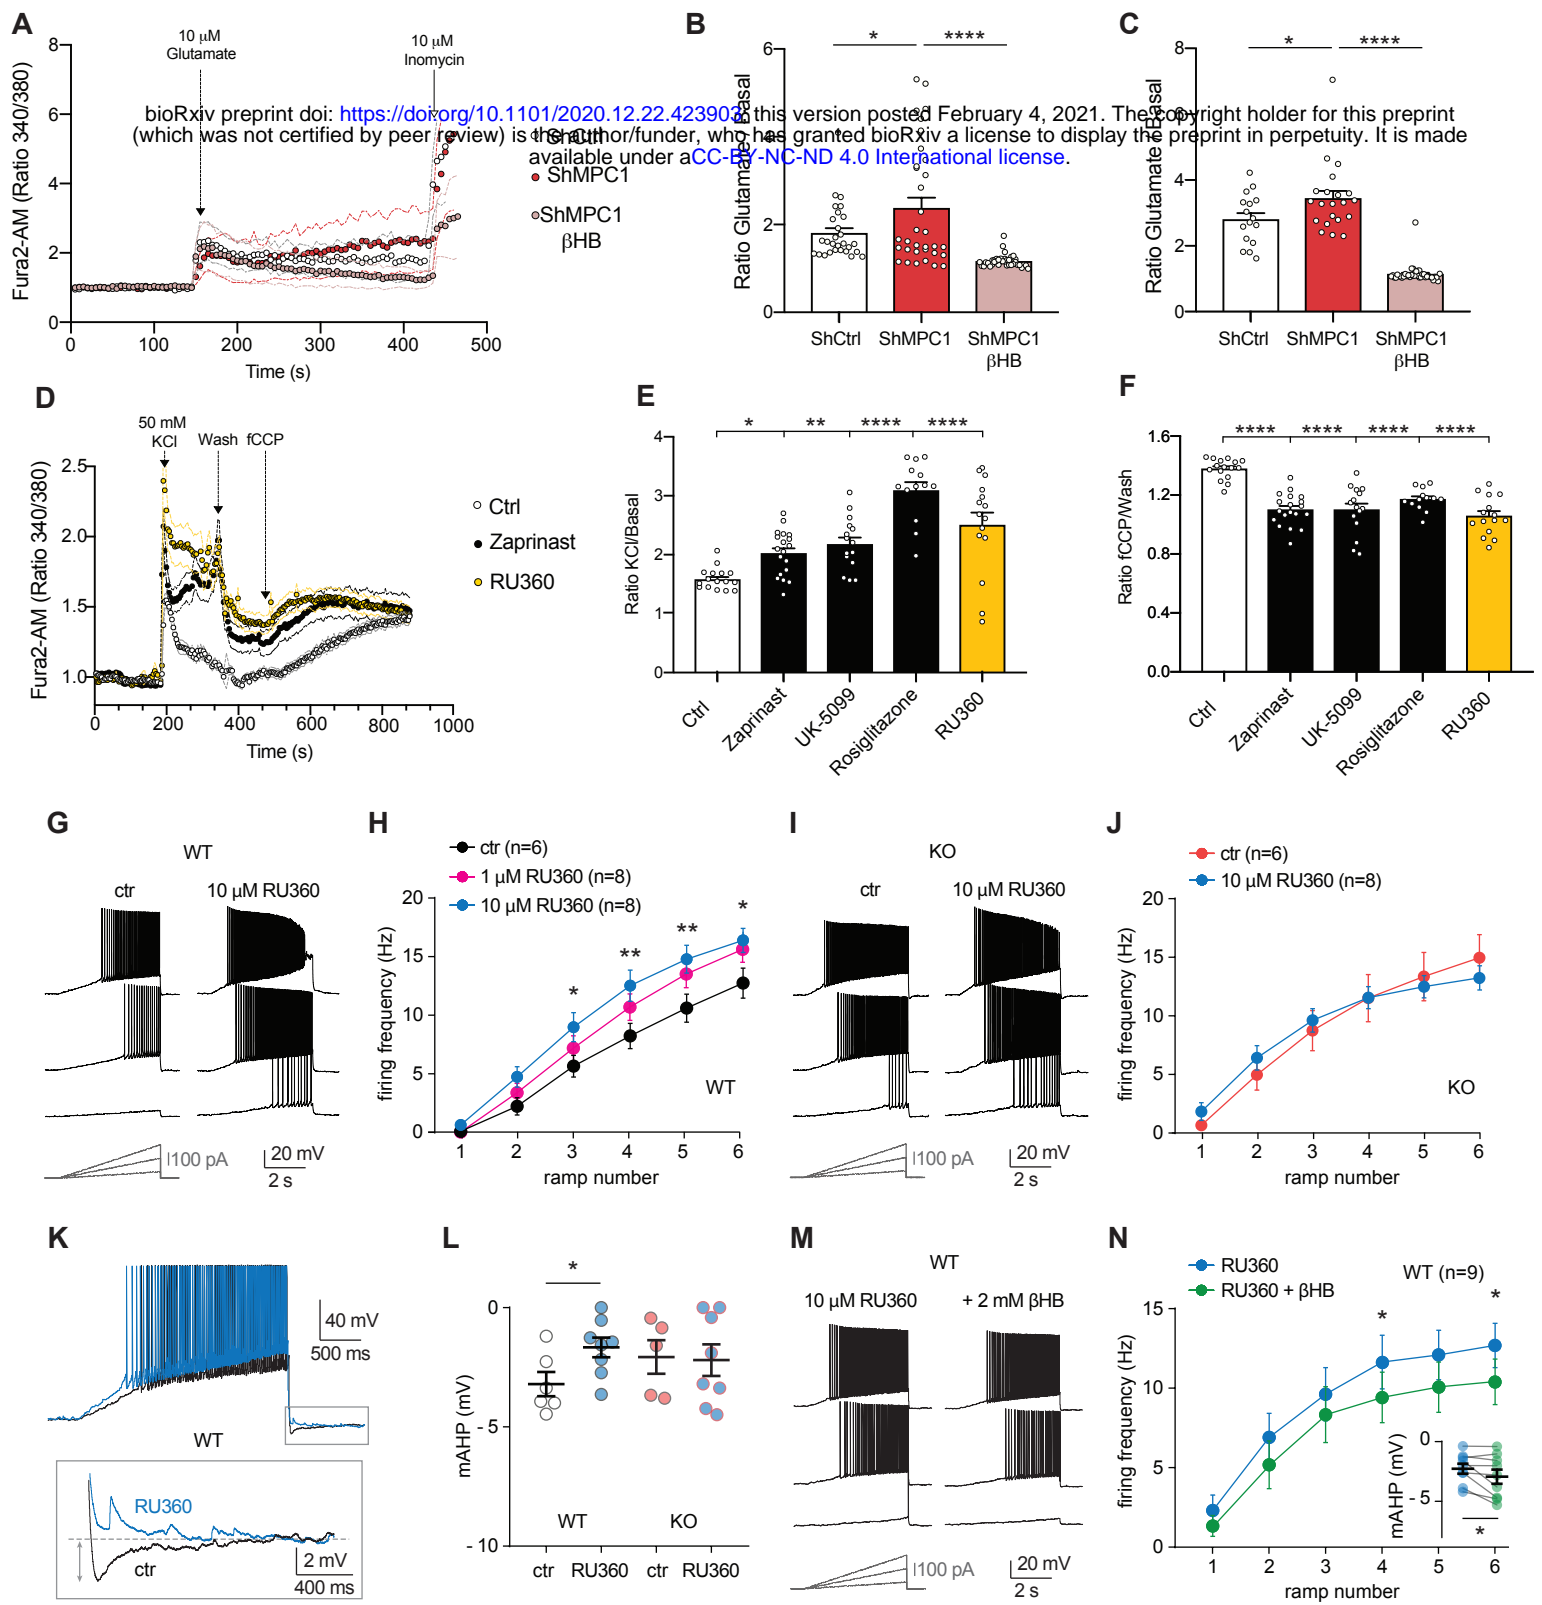

Figure 6
